1

2 **B1 SINE-binding ZFP266 impedes reprogramming through suppression of chromatin opening mediated by**  
3 **pioneering factors**

4

5 Daniel F Kaemena<sup>1</sup>, Masahito Yoshihara<sup>2</sup>, James Ashmore<sup>1</sup>, Meryam Beniazza<sup>1</sup>, Suling Zhao<sup>1</sup>, Mårten  
6 Bertenstam<sup>3</sup>, Victor Olariu<sup>3</sup>, Shintaro Katayama<sup>2,4,5</sup>, Keisuke Okita<sup>6</sup>, Simon R Tomlinson<sup>1</sup>, Kosuke Yusa<sup>7,8</sup> &  
7 Keisuke Kaji<sup>1</sup>

8

9

10 <sup>1</sup>MRC Centre for Regenerative Medicine, University of Edinburgh, Edinburgh BioQuarter, 5 Little France  
11 Drive, Edinburgh, EH16 4UU, Scotland, UK. <sup>2</sup>Department of Biosciences and Nutrition, Karolinska Institutet,  
12 141 83 Stockholm, Sweden. <sup>3</sup>Computational Biology and Biological Physics, Lund University, Lund, Sweden.  
13 <sup>4</sup>Research Programs Unit, Stem Cells and Metabolism Research Program (STEMM), University of Helsinki,  
14 00014 Helsinki, Finland. <sup>5</sup>Folkhälsan Research Center, 00014 Helsinki, Finland. <sup>6</sup>Center for iPS Cell Research  
15 and Application, Kyoto University, Kyoto, Japan. <sup>7</sup>Stem Cell Genetics, Wellcome Sanger Institute, Hinxton,  
16 Cambridge, CB10 1SA, UK. <sup>8</sup>Stem Cell Genetics, Institute for Frontier Life and Medical Sciences, Kyoto  
17 University, Kyoto, Japan.

18

19

20

Correspondence: [keisuke.kaji@ed.ac.uk](mailto:keisuke.kaji@ed.ac.uk)

21

## 22 **Abstract**

23 Induced pluripotent stem cell reprogramming is inherently inefficient and understanding the molecular  
24 mechanisms underlying this inefficiency holds the key to successfully control cellular identity. Here, we  
25 report 16 novel reprogramming roadblock genes identified by CRISPR/Cas9-mediated genome-wide  
26 knockout (KO) screening. Of these, depletion of the predicted KRAB zinc finger protein (KRAB-ZFP) *Zfp266*  
27 strongly and consistently enhanced iPSC generation in several iPSC reprogramming settings, emerging as  
28 the most robust roadblock. Further analyses revealed that ZFP266 binds Short Interspersed Nuclear  
29 Elements (SINEs) adjacent to binding sites of pioneering factors, OCT4 (POU5F1), SOX2 and KLF4, and  
30 impedes chromatin opening. Replacing the KRAB co-suppressor with a co-activator domain converted  
31 ZFP266 from a reprogramming inhibitor to a potent reprogramming facilitator. This work proposes SINE-  
32 KRAB-ZFP interaction to be a critical regulator of chromatin accessibility at enhancers for efficient cellular  
33 identity changes and also serves as a resource to further illuminate molecular mechanisms hindering  
34 reprogramming.

35

## 36 **Introduction**

37 The reprogramming of somatic cells into iPSCs via the overexpression of *Oct4 (Pou5f1)*, *Sox2*, *Klf4* and *c-*  
38 *Myc* (OSKM) has provided an important tool for medical research and cell therapies<sup>1</sup>. Equally importantly,  
39 the generation of fully functional iPSCs that are indistinguishable from ESCs from somatic cells has  
40 demonstrated that cellular identity can be completely converted from one type to another by  
41 overexpression of master transcription factors. This has provided a model system to understand how to  
42 control cellular identity. Inhibition of *Trp53* and *Cdkn1a (p21)* revealed OSKM-induced apoptosis and  
43 senescence as a major roadblock of iPSC generation<sup>2-8</sup>. Knockdown of *Dot1l* and *Suv39h1* has demonstrated  
44 H3K79me and H3K9me3 as critical epigenetic modifications that impede this cell conversion<sup>9,10</sup>. Thus,  
45 identifying genes that act against successful reprogramming provides the foundation to understand critical  
46 molecular mechanisms involved in pluripotency induction.

47 Transposable elements (TEs), which constitute approximately 40% of mouse and human genomes, take  
48 part in gene expression regulation as cis-regulatory elements or non-coding RNAs<sup>11</sup>. Long terminal repeat  
49 (LTR) retrotransposons, long interspersed elements (LINEs), and SINEs are the three major classes of  
50 human/mouse TEs and the functional importance of the first two groups in pluripotent cells has been  
51 described<sup>12,13</sup>. Knockdown of the long interspersed element 1 (LINE1) inhibits mouse ESC self-renewal and  
52 induces transition to a 2C state<sup>12</sup>. KLF4 activates transcription of LTR retrotransposon human endogenous  
53 retrovirus subfamily H (HERVH) during reprogramming, and the down-regulation of which is critical for exit  
54 from the pluripotent state of human iPSCs<sup>13</sup>. Chromatin accessibility of SINEs, which constitute ~25% of TEs,  
55 is particularly high in mouse pre-implantation embryos and ESCs<sup>14</sup>, but the functional importance of this  
56 has not been demonstrated yet. Krüppel-associated box (KRAB) zinc-finger proteins (ZFPs) form the largest  
57 TF family in mouse and human genomes with over 300 members<sup>15</sup>. They have evolved to suppress  
58 expression and transposition of rapidly mutating TEs, with about two thirds of human KRAB-ZFPs estimated  
59 to bind to TEs<sup>16</sup>. Thus, some of KRAB-ZFPs might be involved in the regulation of the above mentioned  
60 pluripotency-associated LINE1 and HERVK expression. Binding of KRAB-ZFPs on TEs can also regulate the  
61 expression of nearby genes<sup>17</sup>. Knockout of the KRAB-ZFP cluster in chromosome 2 or chromosome 4, which  
62 contains 40 or 21 KRAB-ZFPs, respectively, in mouse ESCs preferentially up-regulated genes near specific  
63 classes of LTR retrotransposons and LINEs<sup>18</sup>. Overexpression of ZNF611 in human ESCs down-regulated  
64 genes near primate specific SINE-VNTR-Alu (SVA) retrotransposons<sup>19</sup>. Nevertheless, only a small number of  
65 KRAB-ZFPs that predominantly bind SINEs have been reported<sup>16,18</sup>, and the importance of KRAB-ZFP/SINE  
66 interaction for gene expression regulation is not well understood.

67 Here, we report an unbiased genome-wide CRISPR KO screen with a library containing 90,230 sgRNAs  
68 targeting 18,424 protein coding genes. This screen identified 16 genes as novel reprogramming roadblocks,  
69 as well as 8 previously reported roadblock genes. Of those, KO of the previously uncharacterised KRAB-ZFP  
70 gene *Zfp266* accelerated the kinetics of reprogramming and improved efficiency of iPSC generation 4- to  
71 10-fold in various reprogramming contexts. We revealed that ZFP266 binds to B1 SINEs adjacent to OSK  
72 binding sites during reprogramming and impedes chromatin opening. Furthermore, replacing its KRAB co-  
73 suppressor interacting domain with a co-activator interacting domain converted ZFP266 from a

74 reprogramming inhibitor to a reprogramming facilitator. This indicated that B1 SINEs next to OSK binding  
75 sites during reprogramming were critical genetic elements that modulate the efficiency of OSKM-mediated  
76 iPSC generation. This work serves as a resource for better understanding of reprogramming mechanisms  
77 and highlights SINEs as novel transposable elements (TEs) involved in pluripotency induction.

78

## 79 **A CRISPR/Cas9-mediated genome-wide KO screen identified 16 novel reprogramming roadblock genes**

80 We have previously generated a Cas9 expressing mouse ES cell line, named Cas9 TNG MKOS, with a *Nanog*-  
81 *GFP-ires-Puro* reporter and a doxycycline-inducible *MKOS-ires-mOrange* polycistronic reprogramming  
82 cassette in the *Sp3* locus (Supplemental Figure S1A and S1B)<sup>20,21</sup>. Efficient KO by lentiviral sgRNA delivery in  
83 both Cas9 TNG MKOS ESCs and mouse embryonic fibroblasts (MEFs), generated through morula  
84 aggregation of these ESCs, was confirmed using sgRNAs against ICAM1 and CD44, respectively, resulting in  
85 >80% loss of protein within 72 hours (Supplemental Figure S1C and S1D). Reprogramming of Cas9 TNG  
86 MKOS MEFs following sgRNA transduction against known roadblock genes *Trp53* and *Rb1*<sup>3,4,6-8,22</sup>, and  
87 essential genes *Pou5f1* and *Kdm6a*<sup>23</sup>, reproduced the expected reprogramming enhancement and  
88 reduction phenotypes (Supplemental Figure S1E-S1G), confirming that the CRISPR-based KO system as a  
89 powerful tool to investigate gene function in reprogramming. We then performed genome-wide KO  
90 screening using a previously published lentiviral sgRNA library<sup>24</sup>, with an optimized reprogramming  
91 condition consisting of 8 days of reprogramming factor expression followed by 8 days of puromycin  
92 selection for *Nanog*-GFP<sup>+</sup> iPSCs (Figure 1A and Supplemental Figure S1H-S1K). This condition resulted in an  
93 average coverage of ~170 MEFs/sgRNA/screening replicate. Genomic DNA from flow-sorted *Nanog*-GFP<sup>+</sup>  
94 iPSCs was then collected in triplicate, and integrated sgRNAs were Illumina-sequenced after PCR  
95 amplification alongside the original sgRNA plasmid library.

96 The normalized read counts of all sgRNAs and analysis of the screening results with MAGeCK<sup>25</sup> are available  
97 in Supplemental Tables S1, S2 and at <https://kaji-crispr-screen-updated.netlify.app>. Using a false discovery  
98 rate (FDR) <0.1 as a cut-off, we identified 24 genes as reprogramming roadblocks (Figure 1B). This included  
99 16 novel candidates as well as 5 previously characterized genes: *Trp53*, *Cdkn1a*, *Dot1l* and AP-1

100 transcription factor components *Jun* and *Fosl2*<sup>26,27</sup>, and 3 genes previously uncharacterized yet identified in  
101 other screens, *Men1*, *Gtf2i* and *Cdk13*<sup>28,29</sup>, signifying the robustness of our screen (Figure 1C and 1D). When  
102 the top 3 ranked sgRNAs for each gene were individually tested, transduction of *Trp53* and *Cdkn1a* sgRNAs  
103 produced the largest increase in *Nanog*-GFP<sup>+</sup> colony numbers (Figure 1E and 1F), although they also  
104 significantly increased the number of partially reprogrammed colonies (Figure 1F and Supplemental Figure  
105 S2A). Transduction of sgRNAs targeting all other genes, except for the previously reported roadblock *Cdk13*,  
106 enhanced *Nanog*-GFP<sup>+</sup> colony formation between 2- and 6-fold (Figure 1E and Supplemental Figure S2A),  
107 verifying the inhibitory effects of the novel reprogramming roadblock genes. Expression of the validated 23  
108 roadblock genes during reprogramming did not follow any common particular pattern and many of them  
109 exhibited consistently low expression, compared to the common housekeeping genes or the  
110 reprogramming and pluripotency marker genes<sup>30</sup> (Supplemental Figure S2B). This highlights the advantage  
111 of functional screening to identify their inhibitory effects over expression profiling.

112 Of the 16 novel roadblock genes, KO of 8 resulted in a >4-fold enhancement similar to or better than  
113 previously reported roadblocks (Figure 1E). We therefore further characterised these 8 novel  
114 reprogramming roadblocks; *Fam122a*, *Zfp266*, *Bcor1l*, *Usp28*, *Usp34*, *Zc3h10*, *Scaf8* and *Spop* (Figure 1F,  
115 blue), alongside the previously reported roadblocks *Trp53*, *Cdkn1a*, *Men1*, *Dot1l* and *Gtf2i* (Figure 1F,  
116 green), as 13 top roadblocks.

117

### 118 ***Zfp266* KO consistently enhances and accelerates the attainment of pluripotency**

119 Reprogramming roadblock function is influenced by multiple elements such as the stoichiometry or  
120 expression levels of OSKM, culture conditions, and starting cell types<sup>20</sup>. Thus, we examined the KO effects  
121 of our 13 top roadblocks in different reprogramming contexts. We first performed *piggyBac* transposon-  
122 based reprogramming with an *MKOS* or *STEMCCA* (*OKSM*) reprogramming cassette<sup>31,32</sup> (Supplemental  
123 Figure S3A). The *STEMCCA* cassette expresses lower levels of KLF4 protein due to an N-terminal truncation  
124 following a 2A peptide<sup>33</sup>, resulting in inefficient mesenchymal-epithelial transition (MET) and a higher  
125 proportion of partially reprogrammed cells<sup>20,34</sup>. *piggyBac* delivery of the *MKOS* cassette together with each

126 sgRNA against all the 13 roadblocks enhanced reprogramming of *Cas9 Nanog*-GFP MEFs as seen with *Cas9*  
127 TNG MKOS MEFs before (Figure 2A and 2B), despite a markedly lower KO efficiency with the *piggyBac*  
128 system compared to lentiviral sgRNA delivery (Supplemental Figure S3B). In STEMCCA-mediated *piggyBac*  
129 reprogramming, KO of all roadblocks, except *Cdkn1a*, *Fam122a* and *Zc3h10*, increased the number of  
130 *Nanog*-GFP<sup>+</sup> colonies, though *Cdkn1a* and *Fam122a* KO drastically increased *Nanog*-GFP<sup>-</sup> colony numbers  
131 (Figure 2C and 2D). In particular, the KO of *Zfp266* increased numbers of *Nanog*-GFP<sup>+</sup> colonies ~10-fold with  
132 almost all colonies expressing *Nanog*-GFP (Figure 2C and 2D). When *piggyBac* MKOS+sgRNA vectors were  
133 used to reprogram *Cas9* expressing neural stem cells (NSCs), sgRNAs against *Men1*, *Fam122a*, *Zfp266* and  
134 *Usp34* increased reprogramming efficiency, with KO of *Zfp266* again leading to the greatest enhancement  
135 in NANOG<sup>+</sup> colony formation (~5-fold) (Figure 2E and 2F). When we explored reprogramming kinetics by  
136 assessing expression changes of reprogramming markers, CD44, ICAM1 and *Nanog*-GFP<sup>35</sup> using *Cas9* TNG  
137 MKOS MEFs, KO of 5 genes, *Men1*, *Gtf2i*, *Dot1l*, *Zfp266* and *Zc3h10*, demonstrated accelerated  
138 reprogramming (Figure 2G, 2H, and Supplementary Figure 3C). In summary, KO of *Zfp266* exhibited the  
139 most context-independent and robust reprogramming enhancement amongst all roadblock genes we  
140 identified. We therefore investigated further how *Zfp266* impedes the reprogramming process.

141

#### 142 **ZFP266 impedes activation of pluripotency genes via its KRAB domain**

143 *Zfp266* is predicted to encode a KRAB-ZF protein with a singular KRAB-A module in the N-terminus and  
144 putative DNA binding domain with 12x C2H2 type zinc finger array in the C-terminus (Figure 3A). KRAB  
145 domains are known to interact with co-suppressor KAP-1/TRIM28, a scaffold protein that can recruit  
146 epigenetic modifiers and promote the formation of heterochromatin and transcriptional repression<sup>36</sup>,  
147 suggesting that ZFP266 acts as a suppressor. Consistent with the reprogramming enhancement by *Zfp266*  
148 KO, overexpression of exogenous *Zfp266* completely disrupted reprogramming (Figure 3B). Exogenous  
149 overexpression of *Zfp266* mutants either lacking the entire KRAB domain or containing point mutations  
150 which disrupt the interaction with KAP-1/TRIM28<sup>37,38</sup> could not abolish *Zfp266* sgRNA-mediated  
151 reprogramming enhancement even though the *Zfp266* mutants were resistant to the sgRNA (Figure 3C and

152 3D). This clearly demonstrates that *Zfp266* inhibits reprogramming through its KRAB-domain.

153

154 To assess further the function of *Zfp266*, we examined the gene expression changes associated with its  
155 depletion (Supplemental Tables S3). RNA-seq of MEFs 4 days after *Zfp266* sgRNA transduction revealed  
156 only 4 differentially expressed genes (DEGs) ( $FDR < 0.05$ ,  $\log_2FC > |1|$ ), demonstrating that loss of ZFP266  
157 alone was not sufficient to cause drastic gene expression changes in MEFs (Figure 3E, Supplemental Tables  
158 S4). In contrast, the number of DEGs between *Zfp266* KO and wild-type cells rapidly increased during  
159 reprogramming from 24 at day 3 to 222 at day 5, and to 1761 at day 7 (Figure 3E, Supplemental Tables S5-  
160 S7). The majority of DEGs at day 3 and day 5 were upregulated (75% and 67% respectively, Figure 3E),  
161 consistent with the predicted role for *Zfp266* as a transcriptional suppressor. Enhanced up-regulation of  
162 pluripotency-associated genes *Piwi2* and *Dppa5a* at day 3, *Nanog*, *Esrrb*, *Dppa2*, *Tcl1*, etc. at day 5 was  
163 already detected in *Zfp266* KO (Figure 3E). Furthermore, over 60% (11/18), 80% (120/149), 69% (575/835)  
164 of up-regulated DEGs in *Zfp266* KO cells at day 3, 5, 7 of reprogramming were genes more highly expressed  
165 in ESCs compared to MEFs ( $FDR < 0.05$ ,  $\log_2FC > |1|$ ) (Figure 3E, green, Supplemental Tables S8). Gene  
166 ontology (GO) enrichment analysis identified 'stem cell population maintenance' in day 5 and 'response to  
167 leukaemia inhibitory factor' in day 7 up-regulated DEGs as the most enriched terms (Figure 3F), while  
168 downregulated DEGs at day 7 were significantly enriched in developmental and differentiation terms  
169 (Figure 3F). Principal component analysis (PCA) also indicated that gene expression changes that have  
170 occurred in *Zfp266* KO reprogramming at day 5 and 7 reflected an accelerated transition towards a  
171 pluripotent state (Figure 3G). Taken together, these data indicate that *Zfp266* KO enhances and accelerates  
172 reprogramming by permitting a more efficient activation of pluripotency genes by OSKM.

173

#### 174 ***Zfp266* KO in MEFs results in chromatin opening at the SINE-containing *Zfp266* binding sites**

175 One possible mechanism by which ZFP266 impedes reprogramming is that ZFP266 binds and suppresses  
176 the pluripotency loci in MEFs and other differentiated cells. To investigate this possibility, we mapped  
177 ZFP266 binding sites in MEFs using DamID-seq, which does not required specific antibodies<sup>39,40</sup>. This

178 identified 15,119 unique ZFP266 binding sites (Figure 4A), predominantly situated in introns or intergenic  
179 regions (Supplementary Figure 4A, Supplemental Tables S9). These ZFP266 binding sites have low  
180 chromatin accessibility as measured by ATAC-seq in MEFs, 72 hours after reprogramming, as well as in  
181 iPSCs<sup>41</sup> (Figure 4A). ZFP266 binding sites were predominantly enriched for somatic AP-1 TF motifs (Figure  
182 4B), and little OSKM binding was observed at the same loci in 48hr reprogramming or ESC ChIP-Seq  
183 datasets<sup>42,43</sup> (Supplementary Figure 4B and 4C). This disputed the idea that ZFP266 functions as a  
184 suppressor at the pluripotency-related gene loci in differentiated cells. Thus, we investigated whether any  
185 TE families were enriched in ZFP266 binding sites, since many KRAB-ZFPs are known to bind and suppress  
186 transcription of TEs<sup>15</sup>. In line with this, we found the 15,119 ZFP266 DamID-seq peaks in MEFs were highly  
187 enriched in SINEs with about two thirds (10,523) overlapping with SINEs (Figure 4C and 4D). Of SINE  
188 subfamilies, B1 SINEs in particular exhibited both the most significant enrichment and the most abundant  
189 overlap with ZFP266 binding sites (Figure 4C and 4D). Furthermore, de novo motif analysis of ZFP266  
190 binding sites identified 3 long de novo motifs which all corresponded to parts of the B1 SINE consensus  
191 sequence (Figure 4E), suggesting ZFP266 might bind B1 SINEs.

192 We next examined how depletion of ZFP266 might affect chromatin accessibility. To this end, we  
193 performed ATAC-Seq of *Zfp266* KO MEFs and identified 479 more open regions (MORs) compared to WT  
194 MEFs, while only one locus was found to be a more closed (Figure 4F and Supplemental Tables S10).  
195 Considering the predicted suppressor function of ZFP266, we next examined whether ZFP266 binds to the  
196 MORs in wild-type MEFs. Although only about 25% (123/479) of *Zfp266* KO MEF MORs overlapped with  
197 ZFP266 DamID-seq peaks, non-overlapped MORs also had increased DamID-seq signals albeit at a lower  
198 level (Figure 4G), unlike randomly selected control regions with similar chromatin accessibility  
199 (Supplementary Figure 4D). This suggests that more than 25% of MORs are likely bound by ZFP266, while  
200 they were not identified as a 'peak' with our DamID-seq due to the cut-off criteria and/or technical  
201 limitations. In fact, similar to ZFP266 DamID-seq peaks in MEFs, *Zfp266* KO MEF MORs were mainly located  
202 in intergenic regions and introns (Supplementary Figure 4E), and enriched in AP-1 TF motifs, with 87% of all  
203 *Zfp266* KO MEF MORs containing at least one AP-1 TF motif (Figure 4H). *De novo* motif discovery analysis  
204 also identified 5 motifs that overlap with the B1 SINE consensus sequence (Figure 4I), consistent with the



205 fact that SINEs were the most enriched repetitive element (Figure 4J), and 92% (441/479) of *Zfp266* KO MEF  
206 MORs had at least one SINE (Figure 4K). Overall, these data suggest that ZFP266 binds to B1 SINEs in MEFs  
207 to keep target loci closed, and removal of ZFP266 allows TFs that binds nearby, like AP-1 TFs, to facilitate  
208 chromatin opening (Figure 4L). However, ZFP266 does neither bind to nor regulate pluripotency gene loci in  
209 MEFs.

210

### 211 ***Zfp266* KO in reprogramming results in chromatin opening at SINE-containing OSK binding sites**

212 In order to address why *Zfp266* KO results in significant reprogramming enhancement, we performed  
213 ATAC-seq 72 hours after reprogramming with and without *Zfp266* KO. Similar to the KO effects in MEF,  
214 *Zfp266* KO reprogramming cells exhibited 1522 MORs, the majority of which were situated in intergenic  
215 regions and introns (Supplementary Figure 5A), and only 86 more closed regions compared to wild-type  
216 cells (Figure 5A, Supplemental Tables S11). They were also significantly enriched in SINEs, particularly B1  
217 SINEs (Figure 5B), with >90% (1459/1522) of MORs containing at least one SINE (Figure 5C). *De novo* motif  
218 discovery analysis also identified motifs that correspond to the B1 SINE consensus sequence as the most  
219 significant motifs (Figure 5D). However, these loci hardly overlapped with *Zfp266* KO MEF MORs (Figure 5E),  
220 suggesting a context dependency for which loci become more open in the absence of ZFP266. The overlap  
221 with MEF ZFP266 DamID-seq peaks was also minimal, with only ~10% of MORs overlapping (Supplemental  
222 Figure S5B), and non-overlapped MORs did not have increased DamID-seq signals compared to the control  
223 regions with a similar chromatin accessibility (Supplemental Figure S5B). This indicated that upon OSKM  
224 expression ZFP266 changes binding sites at which it regulates chromatin accessibility. TF motif enrichment  
225 analysis revealed that KLF, SOX and the OCT4::SOX2 motifs were highly enriched in *Zfp266* KO  
226 reprogramming MORs, particularly with KLF family (KLF1, KLF5, KLF4, KLF9, KLF12) motifs identified in >90%  
227 of these MORs, while AP-1 TF motifs were also enriched (Figure 5F). Next, we classified *Zfp266* KO  
228 reprogramming MORs into two groups using *K*-means clustering (Figure 5G). The first cluster (121 regions)  
229 are open in both wild-type and *Zfp266* KO MEFs, and then become more closed upon reprogramming,  
230 while *Zfp266* KO cells are more resistant to this closing (cluster 1, Figure 5G). The second cluster contained

231 the majority (1401) of *Zfp266* KO reprogramming MORs, which are closed in both wild-type and *Zfp266* KO  
232 MEFs, and become open following reprogramming, an effect which is enhanced when *Zfp266* is knocked  
233 out (cluster 2, Figure 5G). Cluster 2 indicates that removal of ZFP266 facilitates OSKM-mediated chromatin  
234 opening. In fact, we observed OSK binding in cluster 2 reprogramming MORs with particularly strong KLF4  
235 signal using published reprogramming 48-hour ChIP-Seq datasets<sup>43</sup> (Figure 5H). Similar OSK binding was  
236 observed in an ESC ChIP-Seq dataset albeit to a lesser extent<sup>42</sup> (Supplemental Figure S5C), and about one  
237 third of the cluster 2 loci have an open chromatin state in iPSCs (Supplemental Figure S5D), suggesting that  
238 some of the MORs are OSK targets in pluripotent cells. Interestingly, while both OSK binding and motifs  
239 were enriched close to the MOR peak summit (within 70 bp) (Figure 5H and 5I), SINEs were depleted from  
240 summits and were instead enriched immediately upstream or downstream (~70 bp away from the summit),  
241 therefore being located immediately adjacent to OSK motifs and binding sites (Figure 5I and 5J).  
242 Furthermore, B1 SINEs within the MORs were mostly orientated such that the 5' head sequence was  
243 positioned inwards facing towards the peak summit (Figure 5I and 5J). This positional and directional bias  
244 within the MOR was exclusive to B1 SINE subfamilies as B2 SINEs exhibited no such bias (Supplemental  
245 Figure S5E). Based on these data together with a report that somatic TFs' binding sites drastically change  
246 upon OSKM expression<sup>42</sup>, we speculated that ZFP266 was relocated to B1 SINEs next to OSK binding sites  
247 during reprogramming, where it then impeded chromatin opening.

248

#### 249 **Facilitating chromatin opening at ZFP266 targeted SINEs enhances reprogramming**

250 In order to validate binding of ZFP266 to SINEs, we generated an activator version of *Zfp266* with the KRAB  
251 domain replaced by a flexible linker and three transactivating domains VP64, p65 and Rta (VPR)<sup>44</sup> (Figure  
252 6A), and performed luciferase reporter assays using HEK293 cells. Enhanced luciferase expression was  
253 observed when VPR-*Zfp266*, but not BFP or VPR only controls, was co-transfected with a reporter plasmid  
254 containing the B1 SINE consensus sequence upstream of a SV40 minimal promoter (Figure 6B). Co-  
255 expression of wild-type *Zfp266* alongside VPR-*Zfp266* attenuated this reporter expression (Figure 6C),  
256 confirming ZFP266 specifically binds B1 SINEs. We next examined whether VPR-ZFP266 can bind to *Zfp266*

257 KO reprogramming MORs using the *Luciferase* assay. We selected SINE containing MORs in three genes,  
258 *B3gnt3*, *Piwil2* and *Snx20*, whose transient up-regulation during reprogramming was significantly  
259 augmented by *Zfp266* KO (Figure 6D). These loci are closed in MEFs, open up more in *Zfp266* KO cells upon  
260 reprogramming, and are bound by KLF4 at 48 hours of reprogramming (Figure 6E). Each MOR was cloned  
261 upstream of a minimal SV40 promoter in both a forward and reverse orientation in a luciferase reporter  
262 vector. We found that VPR-*Zfp266* could also enhance luciferase expression from these MOR reporter  
263 vectors (Figure 6F), while co-expression of wild-type *Zfp266* would then ablate it (Figure 6G). Deleting B1  
264 SINE sequences from the *B3gnt3*, *Piwil2* and *Snx20* MORs diminished VPR-*Zfp266*'s ability to enhance  
265 *luciferase* expression, confirming that ZFP266 binds to reprogramming MORs specifically via B1 SINE  
266 sequences (Figure 6H-6J). We also confirmed that OSKM expression enhanced luciferase expression from  
267 the *B3gnt3* and *Snx20* MOR containing reporter vectors in MEFs (Figure 6K), indicating the MORs have  
268 OSKM-dependent enhancer activity. In addition, removing B1 SINE sequences from the *Snx20* MOR led to  
269 an increase in *Luciferase* expression following OSKM induction (Figure 6L), demonstrating B1 SINEs function  
270 to repress reprogramming factor-mediated transactivation, presumably via endogenous ZFP266 binding.  
271 Finally, overexpression of the VPR-*Zfp266* together with OSKM lead to accelerated and enhanced  
272 reprogramming with a robust appearance of *Nanog*-GFP<sup>+</sup> colonies by day 9 (Figure 6M and 6N). Taken  
273 together, we propose a model where 1) ZFP266 binds to B1 SINEs adjacent to OSK binding sites during  
274 reprogramming and acts to impede chromatin opening, and 2) KO of *Zfp266* (or recruitment of co-  
275 activators to these loci) tips the balance in favour of OSK, allowing them to establish a more open  
276 chromatin state to drive gene activation necessary for successful reprogramming (Figure 6O).

277

## 278 **Discussion**

279 Reprogramming towards iPSCs is a conflict between OSKM transcription factors trying to establish a  
280 pluripotent state and somatic factors trying to resist this disruption in cell identity. We have identified 16  
281 novel reprogramming roadblock genes whose depletion facilitates OSKM-mediated pluripotency induction.  
282 One of the most robust roadblock genes, *Zfp266*, is recruited to OSK binding sites through the recognition

283 of adjacent B1 SINEs, where it impedes chromatin opening via its KRAB domain. This probably underlays  
284 the accelerated up-regulation of pluripotency gene by OSKM in both *Zfp266* KO and VPR-*Zfp266*  
285 overexpression reprogramming. In fact, many of *Zfp266* KO MORs at 72 hours of reprogramming have an  
286 open chromatin state and bound by OSK in iPSCs/ESCs, and several of them are associated with  
287 pluripotency genes or other genes highly expressed in ESCs, including *Pou5f1*, *Sall4*, *Zfp42*, *Klf2*, *Piwil2*,  
288 *Fbxo15*, *Dnmt3l*, *Tet1/2* (Supplemental Tables S12). These genes were more efficiently up-regulated in  
289 *Zfp266* KO reprogramming compared to the control (Supplemental Tables S3). Loss of ZFP266 in MEFs lead  
290 to only 4 DEGs, suggesting that ZFP266 may not play a significant role in a static state but act as a safeguard  
291 against drastic changes of cellular states mediated by newly expressed TFs and/or extracellular cues, such  
292 as cytokines. During early embryo development, i.e. 2-8 cell stage, ICM and ESCs, SINEs, particularly B1  
293 SINEs, are enriched in the open chromatin regions, but not in subsequent developmental stages<sup>14</sup>. The data  
294 from International Mouse Phenotyping Consortium shows that only 6.5% of pups from *Zfp266*  
295 heterozygous intercrosses are homozygous for the KO allele, presenting incomplete penetrance and  
296 possible roles of ZFP266 during development while there might be compensation mechanisms  
297 (<https://www.mousephenotype.org/data/genes/MGI:1924769>). Further investigation might reveal roles of  
298 ZFP266 in B1 SINE region closing and neighbouring gene regulation during embryo development. B1 SINEs  
299 within *Zfp266* KO reprogramming MORs displayed a distinct positioning bias enriched at the flanks of MOR  
300 summits, and an orientation bias with head towards the summits. A recent publication identified  
301 enrichment of B1 SINEs at the flanks of CD8+ T-cell specific enhancers<sup>45</sup>. Our work suggests that this  
302 positioning bias could be a much more general feature of B1-SINE linked regulatory elements and provides  
303 evidence that SINEs can affect chromatin states via KRAB-ZFPs. The head-to-tail orientation bias of B1 SINEs  
304 is an intriguing novel observation of our work. Stably positioned nucleosomes are highly enriched in SINE  
305 and LINE retrotransposons in human<sup>46</sup>. Thus, SINEs may have a further architectural or organisational role  
306 of chromatin at the regulatory elements, while it could also be influenced by surrounding DNA sequences  
307 and/or other proteins as about 20-25% of B1 SINE had the reversed tail-to-head orientation towards the  
308 MOR summits. KLF4 has been shown to bind primate/human specific TEs in naive human ESCs and during  
309 reprogramming<sup>13,19</sup>. Interestingly, the *de novo* motif identified in *Zfp266* KO reprogramming MORs, but not

310 *Zfp266* KO MEF MORs or ZFP266 DamID-seq peaks, has a full KLF4 binding motif with a base switch at the 5'  
311 end of B1 SINE consensus sequence, in addition to a partial KLF4 motif enriched in nucleosome enriched  
312 KLF4 target sites<sup>47</sup> (Supplementary Figure S5F). While B1 SINEs are restricted to rodents, KLF4 binding is  
313 enriched in the old world monkey-, ape-, and human-specific TEs, HERVH, HERVK, and SVA, in naïve human  
314 ESCs<sup>19</sup>. The enrichment of KLF4 binding in *Zfp266* KO reprogramming MORs with SINEs indicates conserved  
315 function of KLF4 to regulate gene expression via TE containing regions in reprogramming/pluripotency  
316 across species, which is of clear interest for further investigation. It has been reported that ~2/3 of human  
317 KRAB-ZFPs bind to TEs genome-wide, and KRAB-ZFPs suppress not only TEs, but also expression of genes  
318 nearby<sup>16,17</sup>. Our results suggest a possibility that other KRAB-ZFPs could act as barriers in different TF-  
319 mediated cell conversions or differentiation of pluripotent cells to specific cell types, and therefore  
320 elimination of those obstacles or the use of engineered activator version of KRAB-ZFPs might realize more  
321 efficient cellular identity changes. Our CRISPR/Cas9-mediated genome-wide KO screening also identified  
322 several other novel genes whose inhibition of pluripotency induction would have never been predicted  
323 from transcriptomic analyses. Further understanding how these genes hamper OSKM-mediated  
324 reprogramming will bring us a better understanding of how to control cellular identities.

325

## 326 **Methods**

### 327 **Cell culture**

328 ESCs and MEFs were cultured in ESC medium and in MEF medium, respectively, as described previously<sup>20</sup>.  
329 Reprogramming was performed in reprogramming medium (ESC medium supplemented with 300 ng ml<sup>-1</sup> of  
330 doxycycline (Sigma) and 10 µg ml<sup>-1</sup> of L-ascorbic acid or 2-Phospho-L-ascorbic acid trisodium salt (Vitamin C)  
331 (Sigma). NSCs were cultured in NSC complete medium consisting of DMEM/F-12 Media, 1:1 Nutrient  
332 Mixture (Sigma), 1X N2 supplement (Thermo Fisher Scientific), 1X B27 supplement (Thermo Fisher  
333 Scientific), 8 mM glucose (Sigma), 100 U ml<sup>-1</sup> Penicillin/Streptomycin (ThermoFisher Scientific), 0.001% BSA  
334 (ThermoScientific), 0.05 mM β-mercaptoethanol (Thermo Fisher Scientific), supplemented with 10 ng ml<sup>-1</sup>  
335 mouse EGF (Peprotech) and 10 ng ml<sup>-1</sup> human FGF2 (Peprotech).

## 336 **Plasmids**

337 Plasmids used in this work are summarized in Supplemental Table S13. The plasmids and their sequences  
338 are available upon request.

## 339 **Generation of Cas9 TNG MKOS ESC line and Cas9 TNG MKOS MEFs**

340 The *Rosa26* targeting vector carrying EF1 $\alpha$ -hCas9-ires-neo cassette (Addgene #67987) was electroporated  
341 into TNG MKOS ESC line<sup>20,24</sup>. Correct targeting was confirmed by Southern blotting using KpnI and MscI  
342 digested genome DNA for a 5' and 3' probe, respectively. The 5' and 3' probes were generated from PCR  
343 amplicon using the following primers, 5' forward CAAGTGCTCCATGCTGGAAGGATTG, 5' reverse  
344 TGATTGGGGAGGATCCAGATGGAG, 3' forward GGATTGCACGCAGGTTCTCCG 3' reverse  
345 CGCCGCCAAGCTCTTCAGCAA and genome DNA (for 5' probe) or the targeting vector (for 3' probe) as a  
346 template. Cas9 TNG MKOS MEFs were isolated from E12.5 chimeric embryos generated via morula  
347 aggregation and the proportion of transgenic MEFs from each embryo was assessed measuring % of  
348 mOrange<sup>+</sup> cells after exposing 1/10<sup>th</sup> of the dissociated cells to Dox for 2 days as describe previously<sup>20</sup>.

## 349 **sgRNA screen**

350 The sgRNA library (Addgene #67988) was prepared as describe before<sup>24</sup>.  $9 \times 10^6$  high contribution (>98%  
351 mOrange<sup>+</sup> 2 days after addition of dox) TNG MKOS Cas9 MEF plated across 90 wells of 6-well culture plates  
352 were exposed to lentiviral sgRNA library at MOI=2 for 4 hrs. We used MOI=2 (infection efficiency ~86%) in  
353 order to increase coverage of the sgRNA library, presuming the scarcity of reprogramming relevant genes  
354 and the negligible probability of the same neutral sgRNAs being repeatedly present in combination with  
355 relevant sgRNAs. After viral containing media was removed, the cells were cultured in 3 ml of  
356 reprogramming medium. Medium was replaced once 3 ml a day for the first 3 days, and then twice 4 ml a  
357 day from day 4 of reprogramming. From day 8, the media was switched to ESC medium supplemented with  
358 puromycin (1  $\mu\text{g ml}^{-1}$ ) and medium was replenished twice a day with 4 ml / well until day 16. Puromycin  
359 resistant, *Nanog*-GFP<sup>+</sup> cells were then sorted using the FACS Ariall (BD Biosciences) and stored at -80°C as  
360 cell pellets before extraction of genomic DNA. Screening was performed in triplicate. Genomic DNA from  
361  $3 \times 10^7$  sorted GFP<sup>+</sup> cells was extracted using the Blood & Cell Culture DNA Maxi Kit (Qiagen). Amplification

362 of sgRNA regions from the extracted genome and the original sgRNA plasmid library, and Illumina  
363 sequencing was performed as described before<sup>48</sup>. sgRNA read count data was analysed with MAGeCK  
364 (version 0.4.4)<sup>25</sup> and genes with enriched and depleted sgRNAs were detected using the test command  
365 (default parameters).

#### 366 **Cas9 TNG MKOS MEF reprogramming**

367  $0.25 \times 10^4$  Cas9 TNG MKOS MEFs were mixed with  $9.5 \times 10^4$  WT MEFs (129 strain) and seeded in gelatine-  
368 coated wells of 6-well plates. Cells were transduced with sgRNA lentiviruses at an MOI of 3 with  $8 \mu\text{g ml}^{-1}$   
369 Polybrene (Merck-Millipore) for 4 hours and then reprogramming was initiated by addition of  
370 reprogramming medium. On day 14-16, whole well colony images were taken using the Celigo S Cell  
371 Cytometer (Nexcelom) and the number of *Nanog*-GFP<sup>+</sup> and *Nanog*-GFP<sup>-</sup> colonies were counted. The images  
372 shown for illustration were stitched using Celigo S Cell Cytometer and processed using ImageJ.

#### 373 ***piggyBac* reprogramming of MEFs with sgRNA expression and/or *Zfp266* cDNAs**

374 *Nanog*-GFP MEFs with or without Cas9 expression from the *Rosa* locus isolated from E12.5 embryos, or wild  
375 type MEFs were plated at  $1.5 \times 10^5$  cells per well in a gelatine-coated 6-well plate. 24 hrs later co-  
376 transfection of a Dox-inducible *piggyBac* transposon vector carrying the *tetO-MKOS-ires-mOrange* or *tetO-*  
377 *STEMCCA-ires-mOrange* cassette with sgRNA expression cassette, *PB-CA-rtTA* vector with/without carrying  
378 a *P2A*-linked *Zfp266* cDNAs, and *pCMV-hyPBase* was performed using 500 ng each DNA and 6  $\mu\text{l}$  of  
379 FugeneHD (Promega) as per manufacturer's instructions<sup>20,49,50</sup>. 24 hrs later reprogramming was initiated  
380 with reprogramming medium. Medium was changed every 2 days. For colony counting, whole well colony  
381 images were taken on day 14-16 using the Celigo S Cell Cytometer (Nexcelom) and colonies were counted  
382 with ImageJ.

#### 383 ***piggyBac* reprogramming of NSCs with sgRNA expression**

384 A GFP sgRNA vector was delivered into Cas9 and GFP expressing NSCs using nucleofection with the SG Cell  
385 Line 4DNucleofector X Kit (Lonza) as per manufacturer's instructions<sup>51</sup>. GFP<sup>-</sup> NSCs were sorted using the  
386 FACS Ariall (BD Biosciences) and plated at clonal density. Individual clones were picked and genotyped to

387 confirm GFP KO. NSCs were reprogrammed by nucleofection of a Dox-inducible *piggyBac* transposon vector  
388 carrying the *tetO-MKOS-ires-mOrange* cassette with/without a sgRNA expression cassette, *PB-CA-rtTA*  
389 vector and *pCMV-hyPBBase*.  $2 \times 10^5$  NSCs for essential gene expression were nucleofected with 750 ng each of  
390 the above-mentioned plasmids using SG Cell Line 4DNucleofector X Kit (Lonza), DN-100 program, as per  
391 manufacturer's instructions. Cells were recovered in NSC medium and then plated on a layer of wild type  
392 MEF feeder cells seeded the day before at a density of  $1 \times 10^5$  cells per well in a gelatin-coated 6-well plate.  
393 One day post-nucleofection, reprogramming was initiated with NSC complete medium supplemented with  
394  $100 \text{ U ml}^{-1}$  human LIF,  $0.3 \mu\text{g ml}^{-1}$  of doxycycline (Sigma) and  $10 \mu\text{g ml}^{-1}$  of L-ascorbic acid or 2-Phospho-L-  
395 ascorbic acid trisodium salt (Sigma) (sigma). After 6 days, the medium was switched to serum-free N2B27-  
396 based medium (containing DMEM/F12 medium supplemented with N2 combined 1:1 with Neurobasal®  
397 medium supplemented with B27; all from Thermo Fisher Scientific), MEK inhibitor (PD0325901,  $0.8 \mu\text{M}$ ,  
398 Axon Medchem), GSK3b inhibitor (CHIR99021,  $3.3 \mu\text{M}$ , Axon Medchem),  $1 \mu\text{g ml}^{-1}$  of doxycycline (Sigma)  
399 and  $10 \mu\text{g ml}^{-1}$  of L-ascorbic acid or 2-Phospho-L-ascorbic acid trisodium salt (sigma). At day 16 of  
400 reprogramming, immunofluorescence for NANOG was performed as follows: cells fixed with 4%  
401 paraformaldehyde for 10 minutes on day 14 were permeabilized in 0.1% Triton-X in PBS for 1 hours,  
402 blocked in 5% BSA in PBS with 0.1% Tween20 for 1 hour at room temperature, and then stained in blocking  
403 solution with a primary antibody for NANOG (eBioMLC-51, ThermoFisher Scientific) overnight at  $4^\circ\text{C}$ . The  
404 next day, an AlexaFluor488 conjugated secondary antibody (A-21208, Invitrogen) was applied in blocking  
405 solution for 45 minutes at room temperature before washing and imaging. Whole well images were taken  
406 using the Celigo S Cell Cytometer (Nexcelom) and colonies were counted with ImageJ.

#### 407 **CD44, ICAM1, *Nanog*-GFP expression analysis during reprogramming**

408 Cells harvested at different time points of reprogramming were stained in FACS buffer for 30 min at  $4^\circ\text{C}$  and  
409 washed with FACS buffer prior to acquisition with LSR Fortessa (BD Biosciences) cytometer. The following  
410 antibodies from eBioscience were used: ICAM1-biotin (Clone: 13-0541; Dilution: 1/100), CD44-APC (Clone:  
411 17-0441; Dilution 1/300), streptavidin-PE-Cy7 (Clone: 25-4317-82; Dilution: 1/1500). Dead cells were  
412 excluded using LIVE/DEAD™ Fixable Near-IR Dead Cell Stain Kit (ThermoFisher Scientific, Dilution: 1/1500).  
413 Data were analysed using Flowjo v10.



414 **RNA-Seq**

415 **Sample Preparation.** For Wt and *Zfp266* KO MEF samples,  $1 \times 10^5$  Cas9 TNG MKOS MEFs were transduced  
416 with either a non-targeting control sgRNA or *Zfp266* sgRNA lentivirus at an MOI of 3 with  $8 \mu\text{g ml}^{-1}$   
417 polybrene (Merck-Millipore) for 4 hours. After additional 96 hours culture in MEF media, the cells were  
418 harvested for RNA extraction. For reprogramming samples,  $0.25 \times 10^4$  Cas9 TNG MKOS MEFs were mixed  
419 with  $9.5 \times 10^4$  WT MEFs (129 strain) and seeded in gelatine-coated wells of 6-well plates. Cells were  
420 transduced with either a non-targeting control sgRNA or *Zfp266* sgRNA lentivirus at an MOI of 3 with  $8 \mu\text{g}$   
421  $\text{ml}^{-1}$  Polybrene (Merck-Millipore) for 4 hours, before being recovered for 24 hours in MEF media. After 24  
422 hours reprogramming was initiated by addition of reprogramming medium. Cells were harvested at day 3,  
423 day 5 and day 7 of reprogramming, respectively, and  $1 \times 10^5$  of mOrange<sup>+</sup> OSKM expressing cells were  
424 sorted with the FACS ArialI (BD Biosciences) per sample. *Nanog*-GFP<sup>+</sup> iPSCs were harvested at day 15, and  
425 sorted with the FACS ArialI (BD Biosciences) into 96-well plates. Sorted iPSCs were cultured in ESC medium  
426 with puromycin ( $1 \mu\text{g ml}^{-1}$ ) to select for transgene independent clones and KO of *Zfp266* was confirmed by  
427 genotyping. *Zfp266* KO ESCs were generated by transfecting Clone J ESCs with a *Zfp266* sgRNA plasmid  
428 expressing BFP. Single BFP<sup>+</sup> ESCs were then sorted with the FACS ArialI (BD Biosciences) into 96-well plates  
429 48 hours after transfection. Clones which became BFP- negative (i.e. shed the sgRNA plasmid) were  
430 selected and KO of *Zfp266* was confirmed by genotyping.  $1 \times 10^5$  iPSCs or ESCs were used for RNA  
431 preparation. Cells were homogenised with the QIAshredder kit (Qiagen) and total RNA was extracted from  
432 all samples using the RNeasy Plus Micro Kit (Qiagen). Libraries were prepped with the NEB Ultra II stranded  
433 mRNA Library prep kit (NEB). RNA-Seq libraries were sequenced with NextSeq, 75SE.

434 **Read processing.** For each sequencing run, a quality control report was generated using FastQC and  
435 Illumina TruSeq adapter sequences were removed using Cutadapt<sup>52</sup>. Sequencing runs from the same  
436 biological sample were then concatenated and mapped to the GRCm38 reference genome using STAR<sup>53</sup>.

437 **Differential analysis.** For each biological sample, aligned sequencing reads were first assigned to genomic  
438 features (e.g., genes) using Rsubread<sup>54</sup> and a count table was generated. Differential expression analysis  
439 was then performed with DESeq2<sup>55</sup>, and statistically significant genes (e.g., FDR < 0.05 and

440 log2FoldChange > 1) were identified using the standard workflow. Importantly, although the data  
441 represents a control and treatment time-series experiment, we opted to combine the factors of interest  
442 into a single factor for easier comprehension. Gene ontology analysis for differentially expressed genes was  
443 performed using the goseq package<sup>56</sup>.

444 **Downstream analysis.** For exploratory analysis and visualization, a batch-corrected and regularized log  
445 matrix of expression values was used. The count table was first transformed to stabilize the variance across  
446 the mean using the rlog function from DESeq2 and then unwanted batch effects (e.g., library preparation  
447 date) were removed using the removeBatchEffect function from limma<sup>57</sup>.

#### 448 **DamID-seq**

449 **Sample Preparation.**  $1 \times 10^5$  WT MEFs (129 strain) were nucleofected with either *PGK-mO-Dam* or *PGK-mO-*  
450 *Dam-Zfp266* plasmids using the P4 Primary Cell 4D-Nucleofector X Kit (Lonza). 5 replicates were performed  
451 in total. Cells were recovered in MEF media for 48 hours before  $3 \times 10^4$  -  $1.6 \times 10^5$  GFP+ cells per sample  
452 were sorted with the FACS ArialI (BD Biosciences). Genomic DNA was isolated with Quick-gDNA™  
453 MicroPrep (ZymoResearch) and 32 ng genomic DNA/sample was used for DamID-seq library preparation as  
454 previously described<sup>39</sup>. DamID libraries were sequenced with NextSeq, 40PE.

455 **Read processing.** For each sequencing run, a quality control report was generated using FastQC and  
456 Illumina Nextera adapter sequences were removed using Cutadapt. Sequencing runs from the same  
457 biological sample were then concatenated and mapped to the GRCh38 reference genome using BWA<sup>58</sup>.  
458 Uninformative and spurious alignments were subsequently filtered using a combination of SAMtools<sup>59</sup> and  
459 BEDtools<sup>60</sup> commands. Specifically, reads mapped to the mitochondrial chromosome and reads mapped to  
460 blacklisted regions were filtered.

461 **Peak calling.** For each biological sample, aligned sequencing reads were assigned to genomic features (e.g.,  
462 DpnII restriction fragments) using Rsubread and a count table was generated. Statistically significant  
463 regions of Dam-fusion protein binding (e.g., FDR < 0.05 and log2FoldChange > 1) were detected using the  
464 callPeak command from Daim<sup>39</sup>. For further details, please refer to the original manuscript describing the

465 Daim software<sup>39</sup>. The regions were then annotated and analysed for gene and genome ontology  
466 enrichment using the annotatePeaks command from HOMER<sup>61</sup>.

467 **Downstream analysis.** Heatmaps of read coverage at Dam-fusion binding regions were produced using the  
468 computeMatrix and plotHeatmap commands from deepTools<sup>62</sup>. When plotting heatmaps, a total of 5 peaks  
469 identified exactly over *Zfp266* exons (chr9:20495068-20521417) were removed from the *Zfp266* DamID  
470 peak regions due to the high signal intensity caused by the *PGK-mO-Dam-Zfp266* plasmid. *De novo* motif  
471 discovery and was performed using the MEME-ChIP tool from the MEME suite (version 5.1.1)<sup>63</sup>. Motif  
472 enrichment analysis was performed using findMotifsGenome command from HOMER<sup>61</sup> as DamID-seq's  
473 large peak size was not optimal for the MEME-ChIP tool. Genome browser images of peak regions and read  
474 coverage were composed using the Integrative Genomics Viewer<sup>64</sup>.

#### 475 **ATAC-seq**

476 **Sample Preparation.** Cas9 TNG MKOS MEFs were plated and transduced in the same manner as samples  
477 prepared for RNA-Seq. After 24 hours reprogramming was initiated by addition of reprogramming medium  
478 for reprogramming samples, while MEF samples were maintained in MEF media. Cells were harvested 96  
479 hours after sgRNA transduction (which was 72 hours after OSKM induction for reprogramming samples)  
480 and sorted with the FACS ArialI (BD Biosciences). Cells were then processed for ATAC-Sequencing  
481 according to the Omni-ATAC protocol<sup>65</sup>. Briefly,  $5 \times 10^4$  sorted MEFs or mOrange<sup>+</sup> OSKM expressing cells per  
482 sample were washed with cold 1x PBS then pelleted before the supernatant was discarded. Cell pellets  
483 were then gently resuspended in 50  $\mu$ l of lysis buffer (48.5  $\mu$ l resuspension buffer, 0.5  $\mu$ l 10% NP-40 (Sigma)  
484 0.5  $\mu$ l 10% Tween-20 (Sigma), 0.5  $\mu$ l 1% Digitonin (Promega) (resuspension buffer: 500  $\mu$ l 1M Tris-HCl,  
485 pH7.5 (ThermoFisher), 100  $\mu$ l 5M NaCl (Sigma), 150  $\mu$ l 1M MgCl<sub>2</sub> (Sigma), 49.25 ml nuclease-free H<sub>2</sub>O) and  
486 incubated on ice for 3 minutes. Then, 1 ml of wash buffer (990  $\mu$ l resuspension buffer, 10  $\mu$ l Tween-20  
487 (Sigma)) was added to the tubes before they were gently inverted and then centrifuged for 10 minutes at  
488 500 x g, at 4 °C. Supernatants were then carefully aspirated. Nuclei pellets were then resuspended in 50  $\mu$ l  
489 of transposition mix (2.5  $\mu$ l Tn5 transposase, 25  $\mu$ l 2x TD buffer (both Illumina), 0.5  $\mu$ l 1% Digitonin  
490 (Promega), 0.5  $\mu$ l 10% Tween-20 (Sigma), 16.5  $\mu$ l 1x PBS, 5 $\mu$ l nuclease-free H<sub>2</sub>O) and incubated in a

491 thermomixer at 37 °C, 1000 rpm for 30 minutes. Transposed DNA was then purified with the Zymo DNA  
492 Clean and Concentrator-5 Kit (Zymo Research) and eluted in 21 µl nuclease-free H<sub>2</sub>O. All purified DNA (~20  
493 µl) was used for PCR amplification with NEBNext High Fidelity 2x MasterMix (NEB) and optimum cycle  
494 number was determined by qPCR, as per the protocol. Amplified DNA was then purified with double-sided  
495 bead purification using AMPure XP magnetic beads (Beckman Coulter). Library concentration was  
496 determined with Qubit (ThermoFisher) and fragment size/quality with TapeStation (Agilent). ATAC libraries  
497 were sequenced with NextSeq, 40PE.

498 **Read processing.** For each sequencing run, a quality control report was generated using FastQC and  
499 Illumina Nextera adapter sequences were removed using Cutadapt<sup>52</sup>. Sequencing runs from the same  
500 biological sample were then concatenated and mapped to the GRCm38 reference genome using BWA<sup>58</sup>.  
501 Duplicate reads caused by PCR amplification were subsequently identified using the MarkDuplicates  
502 command from Picard (<https://broadinstitute.github.io/picard/>). Uninformative and spurious alignments  
503 were next filtered using a combination of SAMtools<sup>59</sup> and BEDtools<sup>60</sup> commands. Specifically, reads mapped  
504 to the mitochondrial chromosome, reads mapped to blacklisted regions, reads marked as duplicates, and  
505 reads not properly paired (e.g., reads that aren't FR orientation or with an insert size greater than 2 kb)  
506 were filtered.

507 **Peak calling.** For each biological sample, statistically significant regions of chromatin accessibility (e.g., FDR  
508 < 0.1) were detected using the callpeak command from MACS2<sup>66</sup> ([https://github.com/macs3-](https://github.com/macs3-project/MACS)  
509 [project/MACS](https://github.com/macs3-project/MACS)). For downstream analyses, a consensus set of peaks was created by taking the union across  
510 all biological samples with the multiinter command from BEDtools<sup>60</sup>.

511 **Differential analysis.** For each biological sample, aligned sequencing reads were first assigned to genomic  
512 features (e.g., consensus set of peaks) using Rsubread<sup>54</sup> and a count table was generated. Differential  
513 accessibility analysis was then performed with DESeq2<sup>67</sup> and statistically significant peaks (e.g., FDR < 0.05  
514 and log<sub>2</sub>FoldChange > 1) were identified using the standard workflow.

515 **Downstream analysis.** Heatmaps of read coverage at chromatin accessibility regions were produced using  
516 the computeMatrix and plotHeatmap commands from deepTools<sup>62</sup>. K-means clustering was used to

517 partition the regions into two distinct categories of reprogramming MORs. Genome browser images of  
518 peak regions and read coverage were composed using the Integrative Genomics Viewer<sup>64</sup>. Peaks were  
519 annotated against mm10 with annotatePeaks.pl from the HOMER suite (version 4.11)<sup>61</sup>. *De novo* motif  
520 discovery and enrichment analysis of MORs were performed using the *Zfp266* KO samples' narrowpeak  
521 summits within MORs with the MEME-ChIP tool from the MEME suite (version 5.1.1)<sup>63</sup>. The number of SINE  
522 elements around peaks were counted using the BEDTools window command in a window of  $\pm 500$  bp from  
523 the summits of the peaks. ATAC-seq data of iPSCs were retrieved from GSE98124<sup>41</sup>. ChIP-seq data of ESCs  
524 and MEFs in early reprogramming at 48 hr were retrieved from GSE90895 and GSE168142, respectively<sup>42,43</sup>.  
525 Chip-Seq heatmaps were generated using the deepTools computeMatrix and plotHeatmap commands<sup>62</sup>.

526

## 527 **Luciferase Reporter Assays**

528 The pGL3 reporter plasmid containing the SV40 early promoter (Promega) was used for all luciferase  
529 reporter assays along with an internal control Renilla plasmid (Promega). Luciferase activity was measured  
530 with the GloMax 96-microplate luminometer (Promega) using the Dual-Glo Luciferase Assay System  
531 (Promega). For assays performed in HEK293 cells,  $0.5 \times 10^4$  cells were plated per well of a 96-well plate 24  
532 hours prior to transfection. Transfection mixes were prepared as follows; 100 ng pGL3 reporter plasmid, 0.5  
533 ng Renilla plasmid and 100 ng overexpression plasmid (BFP/VPR/VPR-*Zfp266*/Wt *Zfp266*) were mixed in  
534 Opti-MEM I Reduced Serum Medium (Gibco) up to 100 $\mu$ l. Fugene HD Transfection Reagent (Promega) was  
535 then added at a ratio of 3:1 (reagent:DNA) and 5-10  $\mu$ l was added to each well of cells. Luciferase activity  
536 was measured 48 hours after transfection. For assays performed in MEF/reprogramming cells,  $1 \times 10^4$  TNG  
537 MKOS MEFs were plated per well of a 96-well plate 24 hours prior to transfection, either in MEF media or  
538 ES media +dox (300 ng/ml) to induce OSKM expression. Transfection mixes were prepared as such; 1  $\mu$ g  
539 pGL3 reporter plasmid, 10 ng Renilla plasmid were mixed in Opti-MEM I Reduced Serum Medium up to 100  
540  $\mu$ l. Fugene HD Transfection Reagent was then added at a ratio of 4:1 (reagent:DNA) and 20 $\mu$ l was added to  
541 each well of MEFs/reprogramming cells. Luciferase activity was measured 48 hours after transfection.

542

543 **END NOTE**

544 **Acknowledgements**

545 We thank I. Chambers for providing TNG ESC line, F. Rossi and C. Cryer for assistance with flow cytometry,  
546 Biomed unit staff for mouse husbandry, the Wellcome Sanger Institute sequencing facility for gRNA  
547 sequencing, EMBL GeneCore for RNA-seq, ATAC-seq and DamID-seq, A. Soufi, D. O'Carroll and M.L. Huynh  
548 for comments on the manuscript. Some of the computations for this work were enabled by resources in  
549 project SNIC 2017/7-317 provided by the Swedish National Infrastructure for Computing (SNIC) at the  
550 Uppsala Multidisciplinary Center for Advanced Computational Science (UPPMAX). This work was supported  
551 by European Research Council (ERC) grants ROADTOIPS (no. 261075) and MRC senior non-clinical  
552 fellowship (MR/N008715/1) funded for K.K. We also thank the generous support from Baillie Gifford for the  
553 collaboration between CiRA and MRC CRM, from Japan Agency for Medical Research and Development  
554 (AMED) for CiRA. K.Y. was supported by the Wellcome Trust (206194). D.F.K., J.A. and M.Y. was supported  
555 by the BBSRC (EASTBIO doctoral training partnership), Principal's Career Development scholarship from the  
556 University of Edinburgh, and Japan Society for the Promotion of Science (JSPS) Overseas Research  
557 Fellowships, respectively. V.O. and M.Bertenstam were supported by the Swedish Foundation for Strategic  
558 Research (A3 04 159p). V.O. was also supported by the Swedish Research Council (Vr 621-2008-3074).

559 **Author Contribution**

560 D.F.K. designed and performed sgRNA screen, validation and characterization of the roadblock genes  
561 including *Zfp266*. M.Y., J.A., S.K. and S.R.T. contributed to the analyses of the gRNA sequencing, RNA-seq,  
562 ATAC-seq, ChIP-seq and DamID-seq data sets. M.B. and S.Z. provided technical support. M.Bertenstam and  
563 V.O. generated the screening data website. K.Y. provided the gRNA library, the Rosa26-Cas9 targeting  
564 vector, and advised on the screen. K.K. conceived the study, supervised experiment design and data  
565 interpretation, and wrote the manuscript with D.F.K.

566 **Author Information**

567 The authors declare no competing financial interests. Correspondence and requests for materials should be  
568 address to K.K. (keisuke.kaji@ed.ac.uk).

569

570

571 **References**

- 572 1. Takahashi, K. & Yamanaka, S. Induction of Pluripotent Stem Cells from Mouse Embryonic and Adult  
573 Fibroblast Cultures by Defined Factors. *Cell* **126**, 663–676 (2006).
- 574 2. Zhao, Y. *et al.* Two Supporting Factors Greatly Improve the Efficiency of Human iPSC Generation. *Cell*  
575 *Stem Cell* **3**, 475–479 (2008).
- 576 3. Banito, A. *et al.* Senescence impairs successful reprogramming to pluripotent stem cells. *Genes Dev.*  
577 **23**, 2134–2139 (2009).
- 578 4. Hong, H. *et al.* Suppression of induced pluripotent stem cell generation by the p53-p21 pathway.  
579 *Nature* **460**, 1132–1135 (2009).
- 580 5. Kawamura, T. *et al.* Linking the p53 tumour suppressor pathway to somatic cell reprogramming.  
581 *Nature* **460**, 1140–1144 (2009).
- 582 6. Li, H. *et al.* The Ink4/Arf locus is a barrier for iPS cell reprogramming. *Nature* **460**, 1136–1139 (2009).
- 583 7. Marión, R. M. *et al.* A p53-mediated DNA damage response limits reprogramming to ensure iPS cell  
584 genomic integrity. *Nature* **460**, 1149–1153 (2009).
- 585 8. Utikal, J. *et al.* Immortalization eliminates a roadblock during cellular reprogramming into iPS cells.  
586 *Nature* **460**, 1145–1148 (2009).
- 587 9. Onder, T. T. *et al.* Chromatin-modifying enzymes as modulators of reprogramming. *Nature* **483**, 598–  
588 602 (2012).
- 589 10. Soufi, A., Donahue, G. & Zaret, K. S. Facilitators and Impediments of the Pluripotency  
590 Reprogramming Factors' Initial Engagement with the Genome. *Cell* **151**, 994–1004 (2012).

- 591 11. Bourque, G. *et al.* Ten things you should know about transposable elements. *Genome Biol.* 2018 191  
592 19, 1–12 (2018).
- 593 12. Percharde, M. *et al.* A LINE1-Nucleolin Partnership Regulates Early Development and ESC Identity.  
594 *Cell* 174, 391-405.e19 (2018).
- 595 13. Ohnuki, M. *et al.* Dynamic regulation of human endogenous retroviruses mediates factor-induced  
596 reprogramming and differentiation potential. *Proc. Natl. Acad. Sci. U. S. A.* 111, 12426–12431  
597 (2014).
- 598 14. Lu, J. Y. *et al.* Genomic Repeats Categorize Genes with Distinct Functions for Orchestrated  
599 Regulation. *Cell Rep.* 30, 3296-3311.e5 (2020).
- 600 15. Yang, P., Wang, Y. & Macfarlan, T. S. The Role of KRAB-ZFPs in Transposable Element Repression and  
601 Mammalian Evolution. *Trends Genet.* 33, 871–881 (2017).
- 602 16. Imbeault, M., Helleboid, P. Y. & Trono, D. KRAB zinc-finger proteins contribute to the evolution of  
603 gene regulatory networks. *Nat.* 2017 5437646 543, 550–554 (2017).
- 604 17. Ecco, G. *et al.* Transposable Elements and Their KRAB-ZFP Controllers Regulate Gene Expression in  
605 Adult Tissues. *Dev. Cell* 36, 611–623 (2016).
- 606 18. Wolf, G. *et al.* Krab-zinc finger protein gene expansion in response to active retrotransposons in the  
607 murine lineage. *Elife* 9, 1–22 (2020).
- 608 19. Pontis, J. *et al.* Hominoid-Specific Transposable Elements and KZFPs Facilitate Human Embryonic  
609 Genome Activation and Control Transcription in Naive Human ESCs. *Cell Stem Cell* 24, 724-735.e5  
610 (2019).
- 611 20. Chantzoura, E. *et al.* Reprogramming Roadblocks Are System Dependent. *Stem Cell Reports* 5, 350–  
612 364 (2015).
- 613 21. Ruetz, T. *et al.* Constitutively Active SMAD2/3 Are Broad-Scope Potentiators of Transcription-Factor-  
614 Mediated Cellular Reprogramming. *Cell Stem Cell* 21, 791-805.e9 (2017).



- 615 22. Karetta, M. S. *et al.* Inhibition of Pluripotency Networks by the Rb Tumor Suppressor Restricts  
616 Reprogramming and Tumorigenesis. *Cell Stem Cell* **16**, 39–50 (2015).
- 617 23. Mansour, A. A. *et al.* The H3K27 demethylase Utx regulates somatic and germ cell epigenetic  
618 reprogramming. *Nature* **488**, 409–413 (2012).
- 619 24. Tzelepis, K. *et al.* A CRISPR Dropout Screen Identifies Genetic Vulnerabilities and Therapeutic Targets  
620 in Acute Myeloid Leukemia. *Cell Rep.* **17**, 1193–1205 (2016).
- 621 25. Li, W. *et al.* MAGECK enables robust identification of essential genes from genome-scale  
622 CRISPR/Cas9 knockout screens. *Genome Biol.* **15**, 554 (2014).
- 623 26. Liu, J. *et al.* The oncogene c-Jun impedes somatic cell reprogramming. *Nat. Cell Biol.* **17**, 856–67  
624 (2015).
- 625 27. Onder, T. T. *et al.* Chromatin-modifying enzymes as modulators of reprogramming. *Nat.* **2012**  
626 **4837391** **483**, 598–602 (2012).
- 627 28. Yang, C. S., Chang, K. Y. & Rana, T. M. Genome-wide Functional Analysis Reveals Factors Needed at  
628 the Transition Steps of Induced Reprogramming. *Cell Rep.* **8**, 327–337 (2014).
- 629 29. Michlits, G. *et al.* CRISPR-UMI: Single-cell lineage tracing of pooled CRISPR-Cas9 screens. *Nat.*  
630 *Methods* **14**, 1191–1197 (2017).
- 631 30. O’Malley, J. *et al.* High-resolution analysis with novel cell-surface markers identifies routes to iPS  
632 cells. *Nat.* **2013** **4997456** **499**, 88–91 (2013).
- 633 31. Sommer, C. A. *et al.* Induced Pluripotent Stem Cell Generation Using a Single Lentiviral Stem Cell  
634 Cassette. *Stem Cells* **27**, 543–549 (2009).
- 635 32. Kaji, K. *et al.* Virus-free induction of pluripotency and subsequent excision of reprogramming factors.  
636 *Nature* **458**, 771–775 (2009).
- 637 33. Reinhardt, A., Kagawa, H. & Woltjen, K. N-Terminal Amino Acids Determine KLF4 Protein Stability in  
638 2A Peptide-Linked Polycistronic Reprogramming Constructs. *Stem Cell Reports* **14**, 520–527 (2020).

- 639 34. Kim, S. Il *et al.* KLF4 N-terminal variance modulates induced reprogramming to pluripotency. *Stem*  
640 *Cell Reports* **4**, 727–743 (2015).
- 641 35. O’Malley, J. *et al.* High-resolution analysis with novel cell-surface markers identifies routes to iPS  
642 cells. *Nature* **499**, 88–91 (2013).
- 643 36. Ecco, G., Imbeault, M. & Trono, D. KRAB zinc finger proteins. *Development* **144**, 2719–2729 (2017).
- 644 37. Margolin, J. F. *et al.* Krüppel-associated boxes are potent transcriptional repression domains. *Proc.*  
645 *Natl. Acad. Sci.* **91**, 4509–4513 (1994).
- 646 38. Peng, H., Ivanov, A. V., Oh, H. J., Lau, Y. F. C. & Rauscher, F. J. Epigenetic Gene Silencing by the SRY  
647 Protein Is Mediated by a KRAB-O Protein That Recruits the KAP1 Co-repressor Machinery. *J. Biol.*  
648 *Chem.* **284**, 35670–35680 (2009).
- 649 39. Tosti, L. *et al.* Mapping transcription factor occupancy using minimal numbers of cells in vitro and in  
650 vivo. *Genome Res.* **28**, 592–605 (2018).
- 651 40. Vogel, M. J., Peric-Hupkes, D. & van Steensel, B. Detection of in vivo protein–DNA interactions using  
652 DamID in mammalian cells. *Nat. Protoc.* **2007 26** **2**, 1467–1478 (2007).
- 653 41. Benchetrit, H. *et al.* Direct Induction of the Three Pre-implantation Blastocyst Cell Types from  
654 Fibroblasts. *Cell Stem Cell* **24**, 983-994.e7 (2019).
- 655 42. Chronis, C. *et al.* Cooperative Binding of Transcription Factors Orchestrates Reprogramming. *Cell*  
656 **168**, 442-459.e20 (2017).
- 657 43. Roberts, G. A. *et al.* Dissecting OCT4 defines the role of nucleosome binding in pluripotency. *Nat.*  
658 *Cell Biol.* **2021 238** **23**, 834–845 (2021).
- 659 44. Chavez, A. *et al.* Highly efficient Cas9-mediated transcriptional programming. *Nat. Methods* **2015**  
660 **124** **12**, 326–328 (2015).
- 661 45. Ye, M. *et al.* Specific subfamilies of transposable elements contribute to different domains of T  
662 lymphocyte enhancers. *Proc. Natl. Acad. Sci. U. S. A.* **117**, 7905–7916 (2020).

- 663 46. Li, C. & Luscombe, N. M. Nucleosome positioning stability is a modulator of germline mutation rate  
664 variation across the human genome. *Nat. Commun.* 2020 111 **11**, 1–13 (2020).
- 665 47. Soufi, A. *et al.* Pioneer Transcription Factors Target Partial DNA Motifs on Nucleosomes to Initiate  
666 Reprogramming. *Cell* **161**, 555–568 (2015).
- 667 48. Koike-Yusa, H., Li, Y., Tan, E. P., Velasco-Herrera, M. D. C. & Yusa, K. Genome-wide recessive genetic  
668 screening in mammalian cells with a lentiviral CRISPR-guide RNA library. *Nat. Biotechnol.* 2013 323  
669 **32**, 267–273 (2013).
- 670 49. Woltjen, K. *et al.* piggyBac transposition reprograms fibroblasts to induced pluripotent stem cells.  
671 *Nat.* 2009 4587239 **458**, 766–770 (2009).
- 672 50. Yusa, K., Zhou, L., Li, M. A., Bradley, A. & Craig, N. L. A hyperactive piggyBac transposase for  
673 mammalian applications. *Proc. Natl. Acad. Sci. U. S. A.* **108**, 1531–1536 (2011).
- 674 51. Bressan, R. B. *et al.* Efficient CRISPR/cas9-assisted gene targeting enables rapid and precise genetic  
675 manipulation of mammalian neural stem cells. *Dev.* **144**, 635–648 (2017).
- 676 52. Martin, M. Cutadapt removes adapter sequences from high-throughput sequencing reads.  
677 *EMBnet.journal* **17**, 10–12 (2011).
- 678 53. Dobin, A. *et al.* STAR: ultrafast universal RNA-seq aligner. *Bioinformatics* **29**, 15–21 (2013).
- 679 54. Liao, Y., Smyth, G. K. & Shi, W. The R package Rsubread is easier, faster, cheaper and better for  
680 alignment and quantification of RNA sequencing reads. *Nucleic Acids Res.* **47**, e47–e47 (2019).
- 681 55. Love, M. I., Huber, W. & Anders, S. Moderated estimation of fold change and dispersion for RNA-seq  
682 data with DESeq2. *Genome Biol.* **15**, 550 (2014).
- 683 56. Young, M. D., Wakefield, M. J., Smyth, G. K. & Oshlack, A. Gene ontology analysis for RNA-seq:  
684 accounting for selection bias. *Genome Biol.* **11**, 1–12 (2010).
- 685 57. Ritchie, M. E. *et al.* limma powers differential expression analyses for RNA-sequencing and  
686 microarray studies. *Nucleic Acids Res.* **43**, e47–e47 (2015).

- 687 58. Li, H. & Durbin, R. Fast and accurate short read alignment with Burrows–Wheeler transform.  
688 *Bioinformatics* **25**, 1754–1760 (2009).
- 689 59. Li, H. *et al.* The Sequence Alignment/Map format and SAMtools. *Bioinformatics* **25**, 2078–2079  
690 (2009).
- 691 60. Quinlan, A. R. & Hall, I. M. BEDTools: a flexible suite of utilities for comparing genomic features.  
692 *Bioinformatics* **26**, 841–842 (2010).
- 693 61. Heinz, S. *et al.* Simple Combinations of Lineage-Determining Transcription Factors Prime cis-  
694 Regulatory Elements Required for Macrophage and B Cell Identities. *Mol. Cell* **38**, 576–589 (2010).
- 695 62. Ramírez, F. *et al.* deepTools2: a next generation web server for deep-sequencing data analysis.  
696 *Nucleic Acids Res.* **44**, W160–W165 (2016).
- 697 63. Bailey, T. L., Johnson, J., Grant, C. E. & Noble, W. S. The MEME Suite. *Nucleic Acids Res.* **43**, W39–  
698 W49 (2015).
- 699 64. Robinson, J. T. *et al.* Integrative genomics viewer. *Nat. Biotechnol.* **29**, 24–26 (2011).
- 700 65. Corces, M. R. *et al.* An improved ATAC-seq protocol reduces background and enables interrogation  
701 of frozen tissues. *Nat. Methods* **14**, 959–962 (2017).
- 702 66. Zhang, Y. *et al.* Model-based analysis of ChIP-Seq (MACS). *Genome Biol.* **9**, 1–9 (2008).
- 703 67. Love, M. I., Huber, W. & Anders, S. Moderated estimation of fold change and dispersion for RNA-seq  
704 data with DESeq2. *Genome Biol.* **15**, 1–21 (2014).

705

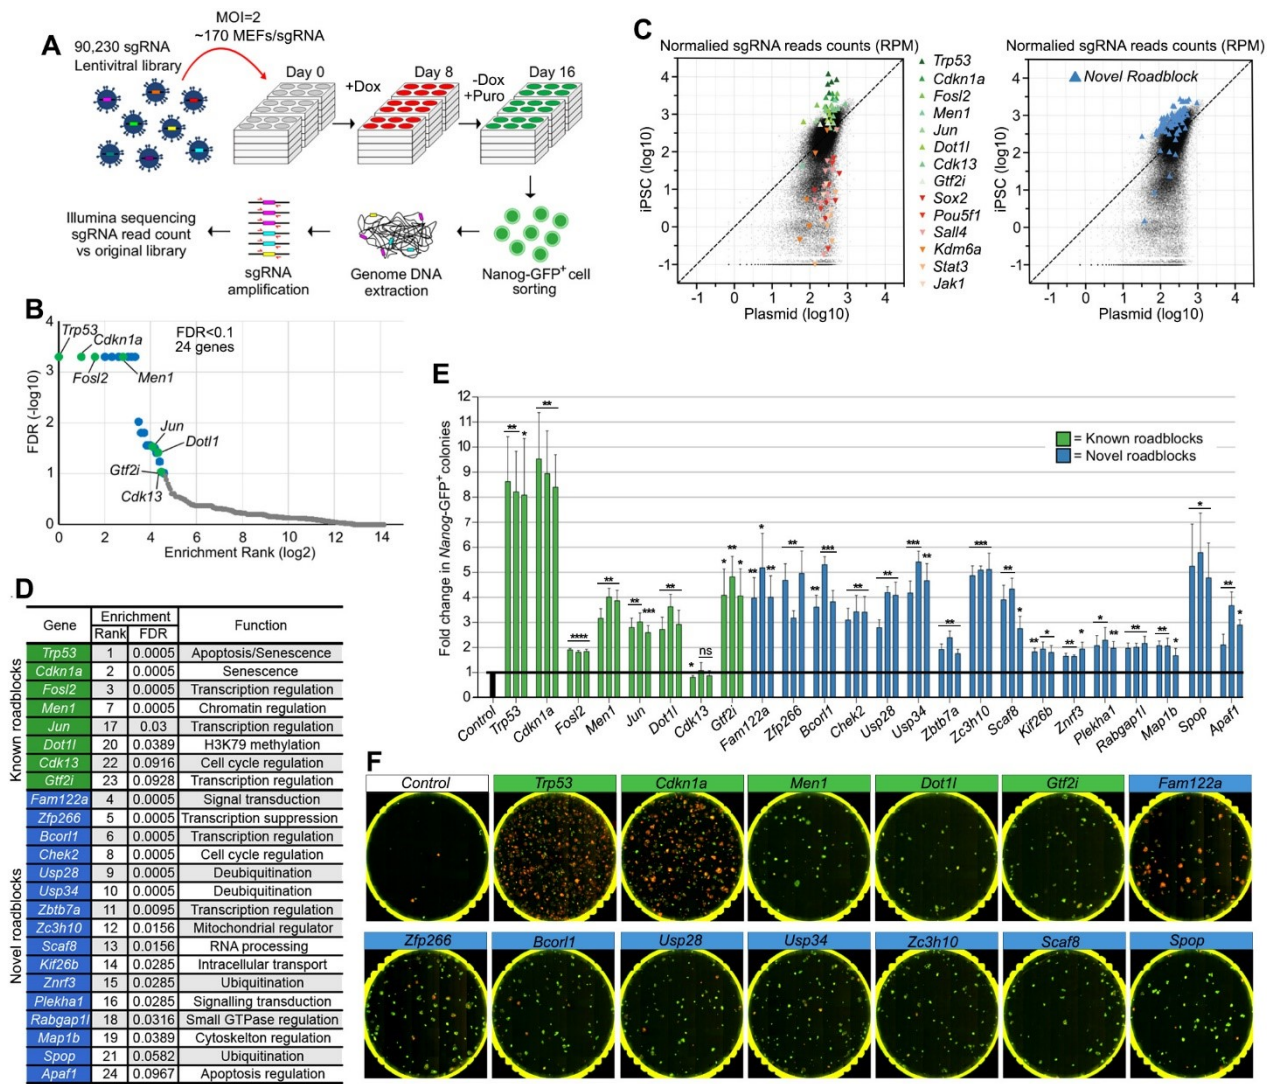

1  
2 **Figure 1. A genome-wide CRISPR screen identifies reprogramming roadblock genes.** **A.** Schematic diagram of  
3 the screening strategy. sgRNA library infected Cas9 TNG MKOS MEFs were cultured in +dox for 8 days then in -  
4 dox and +Puro for additional 8 days. Integrated sgRNAs were amplified from *Nanog*-GFP<sup>+</sup> cells for Illumina  
5 sequencing. **B.** Enrichment FDR ranking with MAGeCK. 24 genes, including 8 previously reported (green) and 16  
6 novel (blue) roadblock genes, were identified using a cut-off of FDR<0.1. **C.** Normalized sgRNA read counts in the  
7 initial plasmid library versus mutant iPSC pool. sgRNAs against previously reported roadblock genes (red/orange)  
8 and genes essential for reprogramming (green) exhibited expected enrichment/depletion respectively (left).  
9 sgRNAs against 16 novel roadblock genes identified in this screen are highlighted in blue (right). **D.** Enrichment  
10 rank, FDR, and function of the 24 discovered roadblock genes. **E.** Validation of the screen result with 3 individual  
11 sgRNAs per gene. This graph is a summary of 5 data sets shown in Supplemental Figure S2A. Error bars indicate  
12 SEM, \*\*\*\*p<0.0001, \*\*\*p<0.001, \*\*p<0.01, \*p<0.05 based on an unpaired two-tailed t-test **F.** Representative  
13 whole-well images of KO reprogramming of 13 top roadblocks from E. Previously reported and novel roadblock  
14 genes were labelled in green and and blue, respectively. Red; mOrange, Green; *Nanog*-GFP.

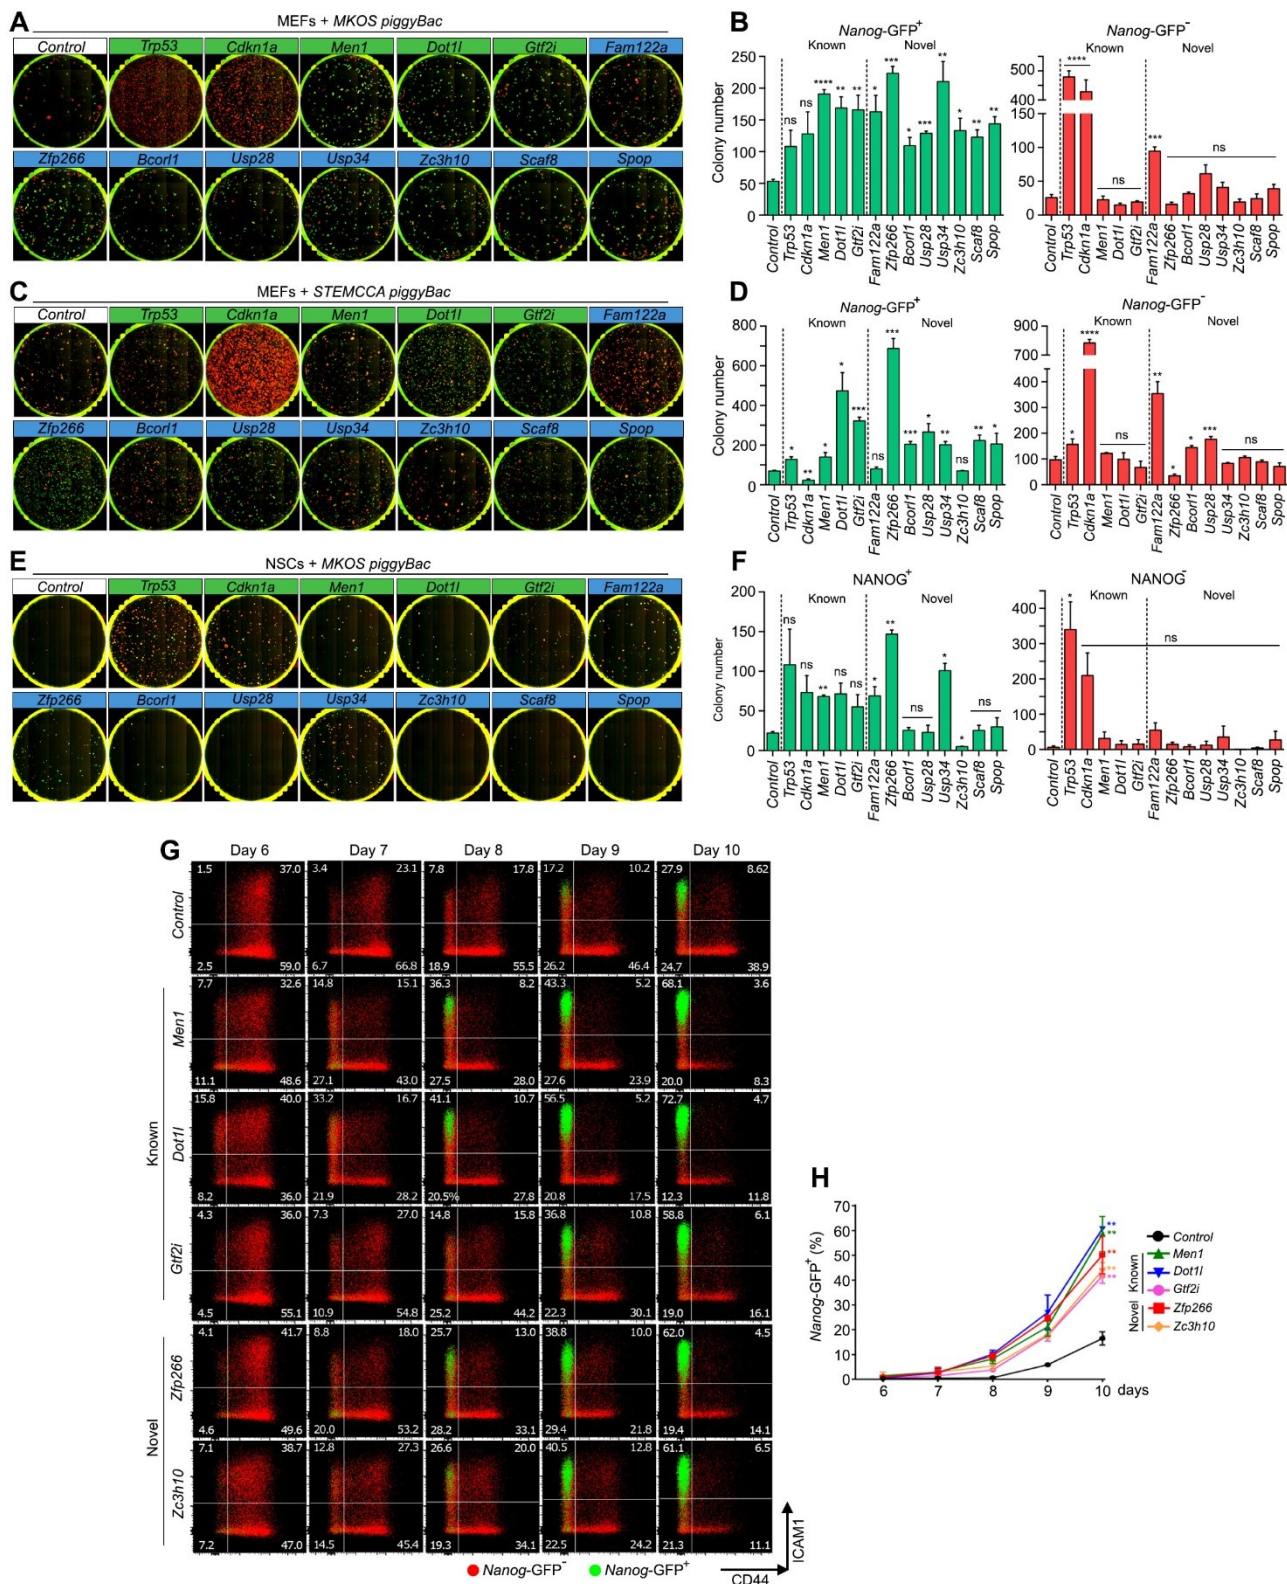

15

16 **Figure 2. Characterization of the roadblock gene KO in different reprogramming systems and kinetics. A, C.**  
 17 *Cas9* expressing *Nanog-GFP* MEF reprogramming with MKOS (A), STEMCCA (C) *piggyBac* transposons with sgRNA  
 18 expression at day 15. Red; mOrange, Green; *Nanog-GFP*. **B, D.** *Nanog-GFP*<sup>+</sup> and *Nanog-GFP*<sup>-</sup> mean colony  
 19 numbers from A and C. **E.** *Cas9* expressing NSC reprogramming with MKOS *piggyBac* transposons with sgRNA  
 20 expression at day 15. Green; immunofluorescence for NANOG. **F.** NANOG<sup>+</sup> and NANOG<sup>-</sup> mean colony numbers  
 21 from E. **G.** Accelerated CD44/ICAM/*Nanog-GFP* expression changes by sgRNA expression against the roadblock  
 22 genes (n=2). Red; *Nanog-GFP*<sup>-</sup> cells, Green; *Nanog-GFP*<sup>+</sup> cells. **H.** Quantification of *Nanog-GFP*<sup>+</sup> cells from day 6  
 23 to 10 of reprogramming. The graph represents an average of 2 independent experiments. For all graphs error  
 24 bars indicate SEM, \*\*\*\*p<0.0001, \*\*\*p<0.001, \*\*p<0.01, \*p<0.05 based on an unpaired two tailed t test.

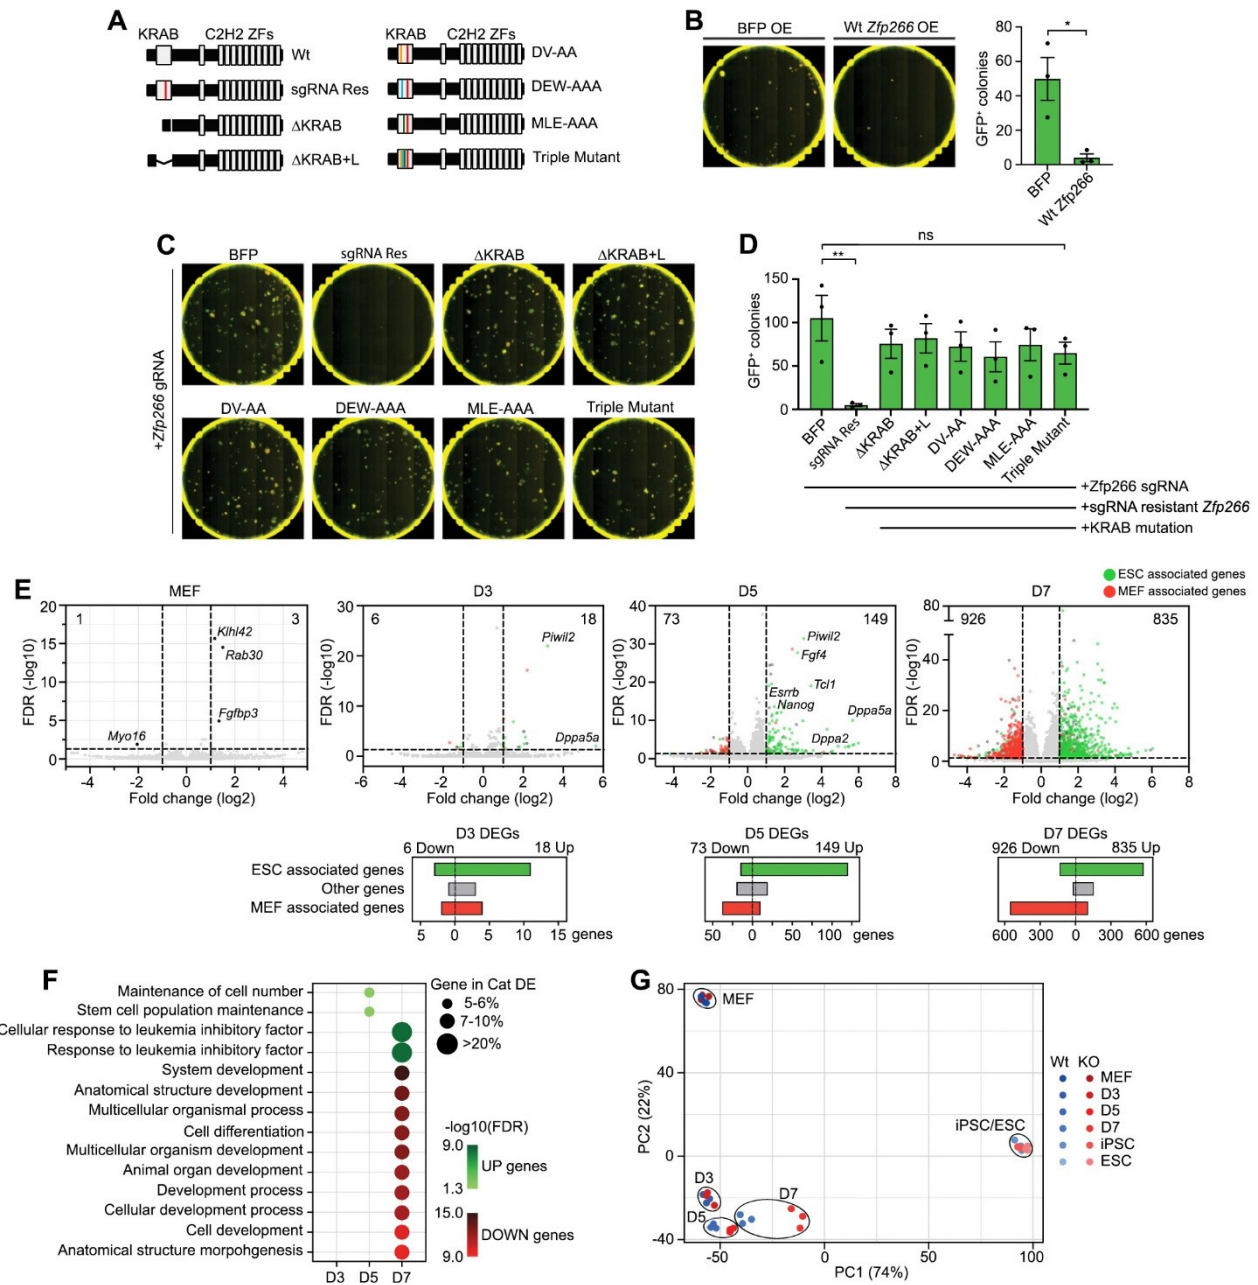

25

26 **Figure 3. ZFP266 impedes activation of pluripotency genes via its KRAB domain.** **A.** Diagram of *Zfp266* Wt and  
 27 mutants. A red bar indicates a silent mutation that confers sgRNA resistance. KRAB domain deletion mutants  
 28 with ( $\Delta$ KRAB+L) and without a linker ( $\Delta$ KRAB) do not have the sgRNA target sequence. DV-AA, DEW-AAA, MLE-  
 29 AAA mutants have alanine substitutions in the indicated critical amino acids in the KRAB domain. Triple mutant  
 30 contains all the alanine substitutions. **B.** *Nanog*-GFP MEF reprogramming with MKOS *piggyBac* transposons and  
 31 BFP or Wt *Zfp266* cDNA overexpression, imaged at day 15. Red; mOrange, Green; *Nanog*-GFP. Error bars indicate  
 32 SEM, \* $p < 0.05$  based on an unpaired two-tailed t-test. **C.** *Cas9* *Nanog*-GFP MEF reprogramming with MKOS  
 33 *piggyBac* transposons, *Zfp266* sgRNA expression as well as BFP, Wt *Zfp266*, or mutant *Zfp266* cDNA  
 34 overexpression, imaged at day 15. Red; mOrange, Green; *Nanog*-GFP. **D.** Mean *Nanog*-GFP<sup>+</sup> colony numbers of C.  
 35 Error bars indicate SEM, \*\* $p < 0.01$  based on a one-way ANOVA test. **E.** RNA-Seq volcano plot of *Zfp266* KO vs Wt  
 36 MEF, day 3, 5 and 7 of reprogramming. Up-regulated and down-regulated genes in KO cells are shown to the  
 37 right and left of the plot, respectively (cut-off  $FDR < 0.05$ ,  $\log_2 FC > |1|$ ). ESC- and MEF-associated genes ( $FDR < 0.05$ ,  
 38  $\log_2 FC > |1|$ ) in ESCs vs MEFs) are highlighted in green and red. Graphs below volcano plots show the number of  
 39 ESC-associated, MEF-associated and other genes within D3, D5, D7 reprogramming differentially expressed  
 40 genes (DEGs). **F.** GO enrichment analysis of upregulated and downregulated genes in *Zfp266* KO reprogramming.  
 41 **G.** Principal component analysis of *Zfp266* Wt and KO RNA-Seq samples. Blue dots indicate Wt samples, red dots  
 42 indicate KO samples, three samples per timepoint.

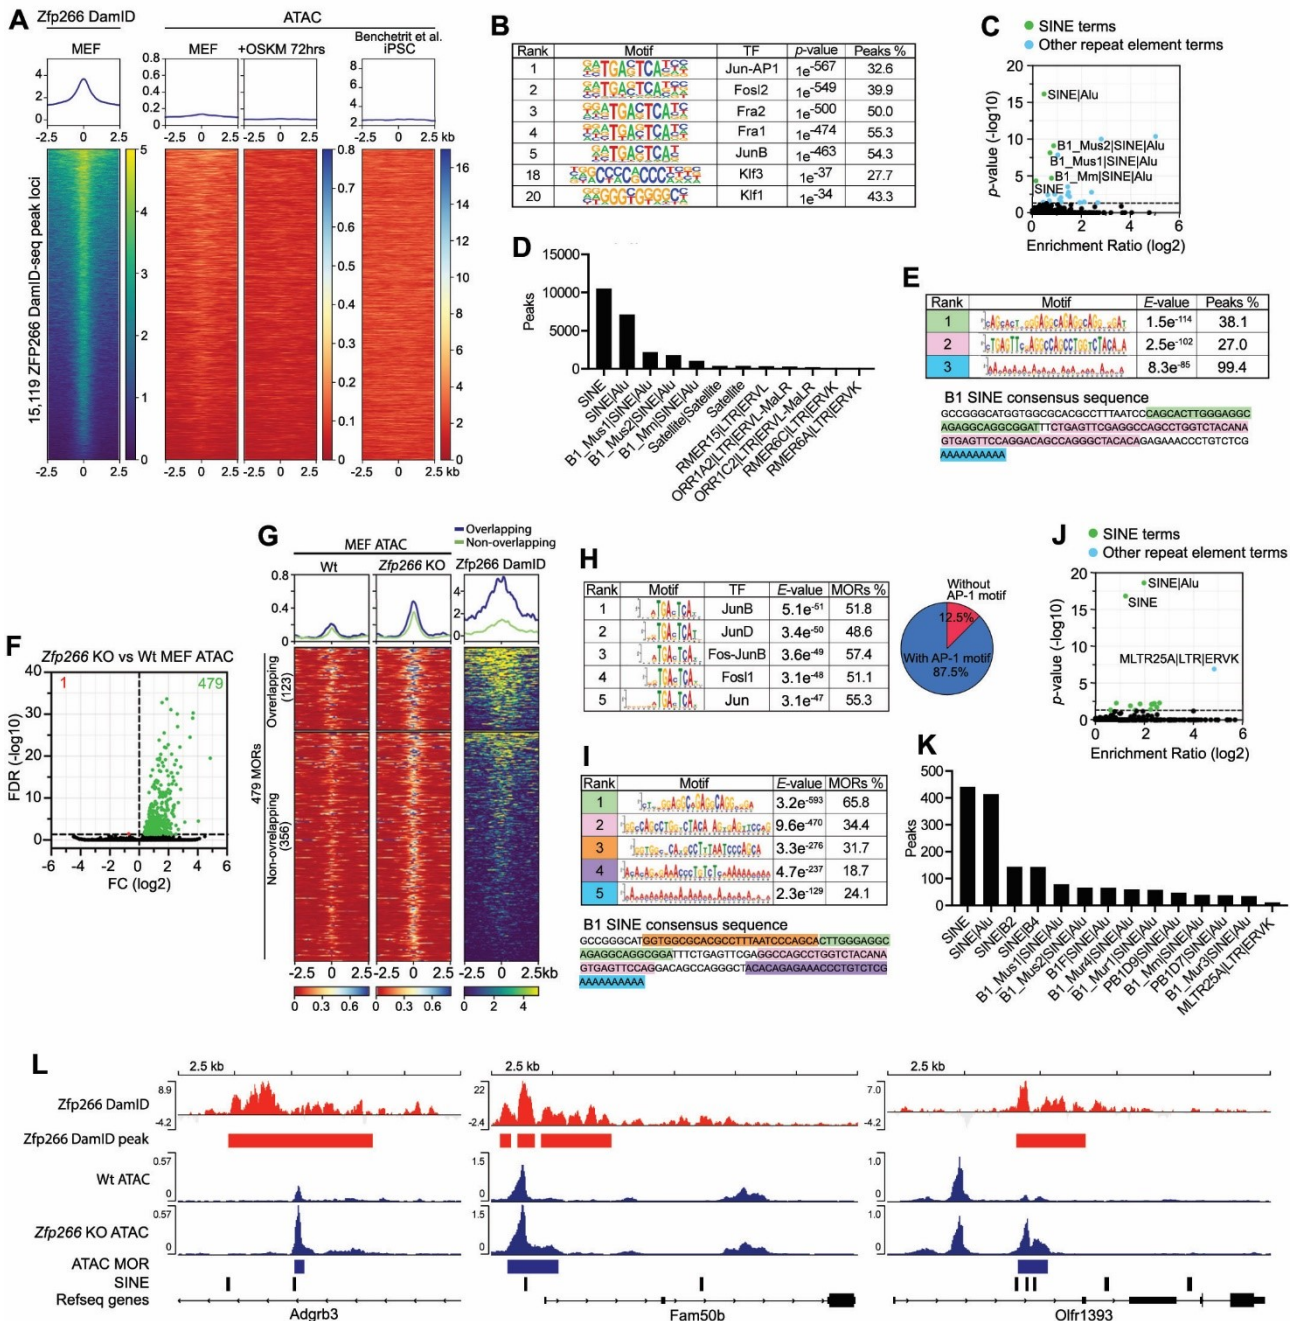

43  
 44 **Figure 4. *Zfp266* KO in MEFs results in chromatin opening at the SINE-containing ZFP266 binding sites. A.**  
 45 ZFP266 DamID-seq signals in MEFs, ATAC-seq signals in MEFs, +72hours of reprogramming, and iPSCs at the  
 46 ZFP266 DamID-seq peak loci. **B.** Motif enrichment analysis with HOMER on ZFP266 DamID-seq peaks. **C.**  
 47 Significance and fold enrichment ratio of transposable element (TE) families overlap with Dam-ZFP266 peaks.  
 48 Green dots indicate significantly enriched SINES, blue dots indicate other significantly enriched TEs. **D.** Number  
 49 of ZFP266 DamID-seq peaks that overlap with TEs. **E.** *De novo* motif discovery analysis with MEME on ZFP266  
 50 DamID-seq peaks. The identified motifs correspond to parts of the B1 SINE consensus sequence, indicated by  
 51 matching colours. **F.** Volcano plot of *Zfp266* KO vs Wt MEF ATAC-seq. Green and red dots indicate more open  
 52 regions (MORs) and more closed regions in *Zfp266* KO MEFs, respectively (FDR<0.05). **G.** ATAC-seq and ZFP266  
 53 DamID-seq signals in the *Zfp266* KO MEF MORs, overlapped (top) and non-overlapped (bottom) with ZFP266  
 54 DamID peaks in MEFs. **H.** Motif enrichment analysis on *Zfp266* KO MEF MORs. Percentages of MORs containing  
 55 each motif and AP-1 motif are indicated. **I.** *De novo* motif discovery analysis on *Zfp266* KO MEF MORs. The top  
 56 five most significant motifs correspond to parts of the B1 SINE consensus sequence, indicated by matching  
 57 colours. **J.** Significance and fold enrichment ratio of transposable element (TE) families overlap with *Zfp266* KO  
 58 MEF MORs. Green dots indicate significantly enriched SINES, blue dots indicate other significantly enriched TEs.  
 59 **K.** Number of *Zfp266* KO MEF MORs that overlap with TEs. **L.** Examples of *Zfp266* KO MEF MORs (Blue) with SINE  
 60 (black), overlapping with ZFP266 DamID-seq peaks (red).



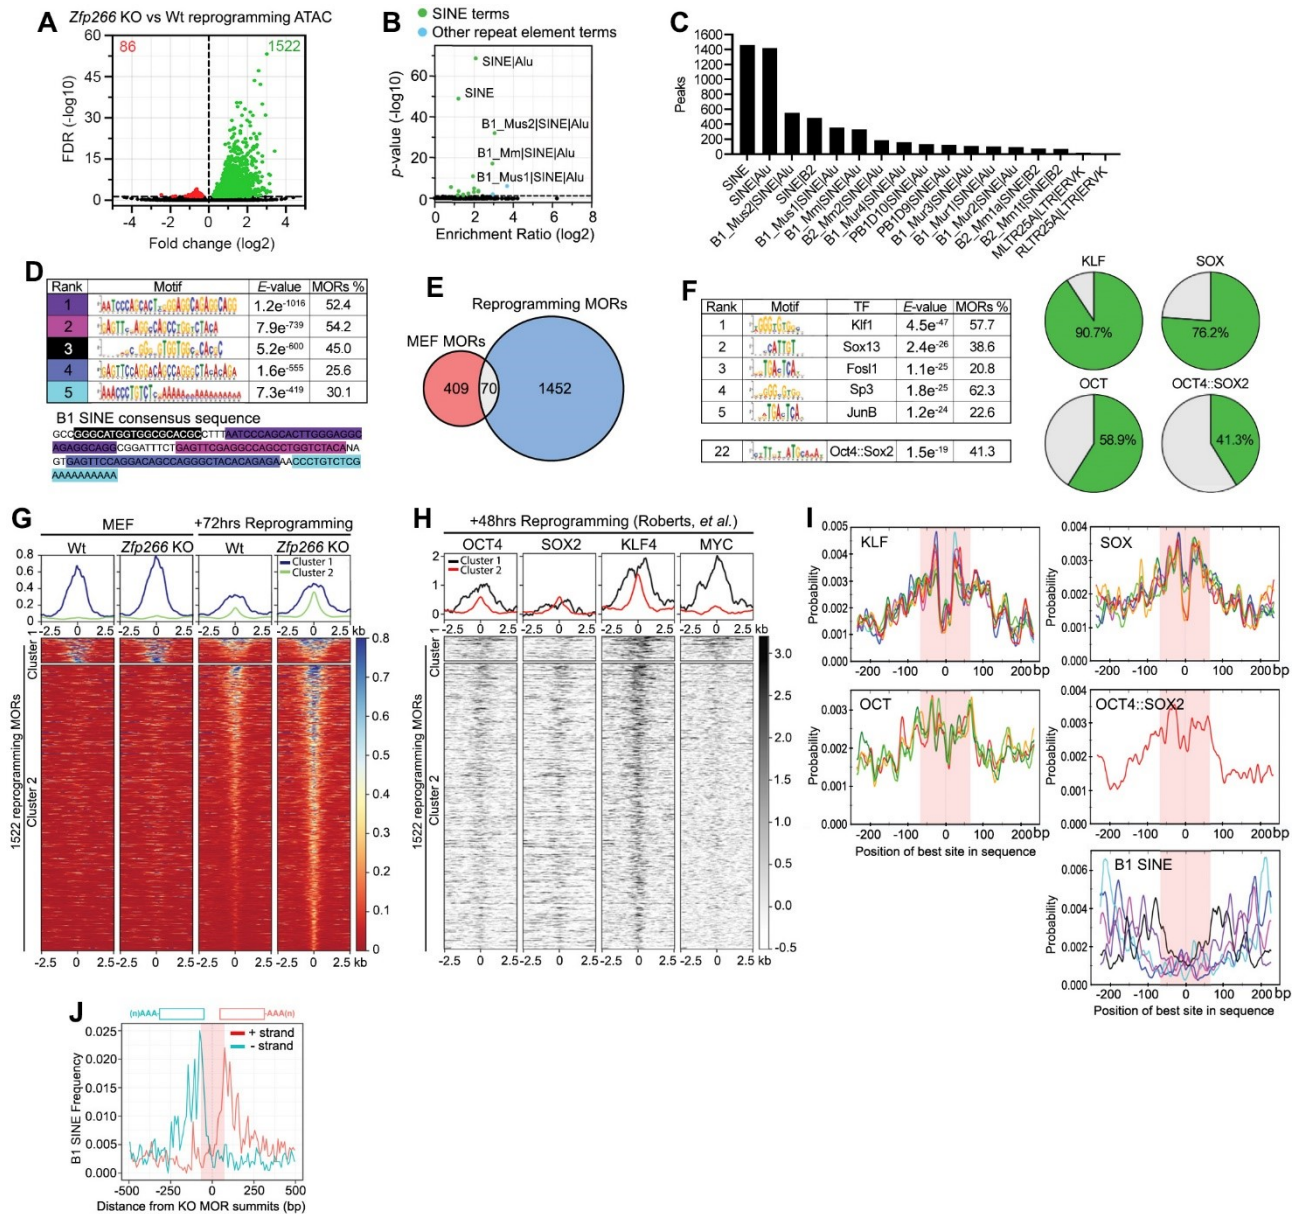

61

62 **Figure 5. Reprogramming *Zfp266* KO MEFs results in chromatin opening at OSK bound, B1 SINE containing loci.**

63 **A.** ATAC-seq volcano plot of *Zfp266* KO vs Wt reprogramming (+72hours after OSKM induction). Green and red  
64 dots indicate more open regions (MORs) and more closed regions in *Zfp266* KO reprogramming, respectively  
65 (FDR<0.05). **B.** Significance and fold enrichment ratio of transposable element (TE) families overlap with *Zfp266*  
66 KO MEF MORs. Green dots indicate significantly enriched SINEs, blue dots indicate other significantly enriched  
67 TEs. **C.** Number of *Zfp266* KO reprogramming MORs that overlap with TEs. **D.** *De novo* motif discovery analysis on  
68 *Zfp266* KO reprogramming MORs. The motifs correspond to parts of the B1 SINE consensus sequence are  
69 indicated by matching colours. **E.** Overlap between *Zfp266* KO MEF MORs and *Zfp266* KO reprogramming MORs.  
70 **F.** Motif enrichment analysis with *Zfp266* KO reprogramming MOR peak summits and percentages of MORs with  
71 KLF, SOX, OCT (POU) family and OCT4::SOX2 motifs. **G.** Classification of *Zfp266* KO reprogramming MORs based  
72 on ATAC-seq signals in MEF and reprogramming 72 hours. **H.** Reprogramming 48 hours OSKM ChIP-Seq heatmaps  
73 at *Zfp266* KO reprogramming MORs. **I.** KLF, SOX, OCT (POU) family, OCT4::SOX2 and SINE motif distribution  
74 within *Zfp266* KO reprogramming MORs. 70 bp from the summit is highlighted in pink. The colours of B1 SINE  
75 motifs correlate to those in D. **J.** Orientation-biased distribution of B1 SINE elements within *Zfp266* KO  
76 reprogramming MORs. Head of B1 SINE tends to locate on the MOR summit side. 70 bp from the summit is  
77 highlighted in pink.

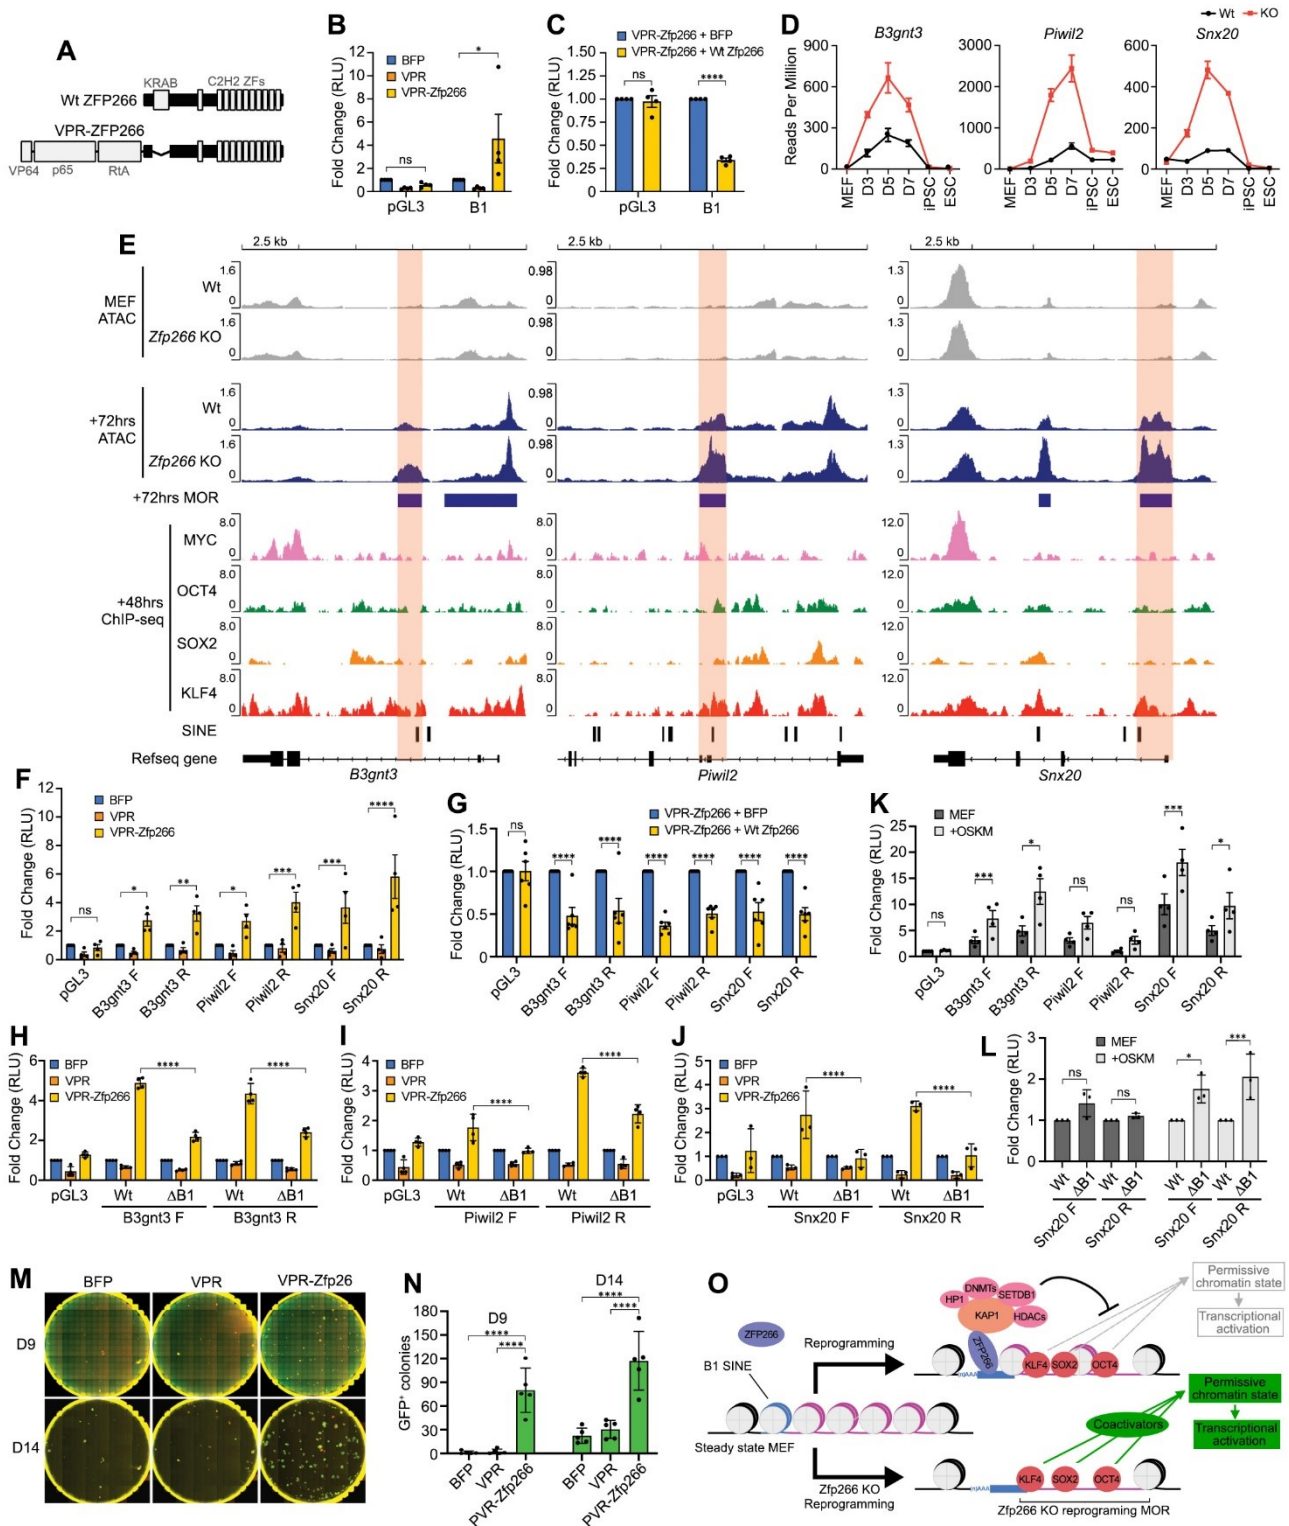

78

79 **Figure 6. ZFP266 binds to B1 SINEs in Zfp266 KO reprogramming MORs that impede OSKM-mediated gene**  
 80 **activation.** **A.** Diagram of Wt ZFP266 and a synthetic activator version of ZFP266, VPR-ZFP266. **B, C.** Luciferase  
 81 reporter assay with either an empty reporter vector pGL3 or with a reporter vector with the B1 SINE consensus  
 82 sequence, co-expressed with either BFP, VPR only or VPR-Zfp266 expression vectors (**B**), with either BFP or Wt  
 83 Zfp266 expression vectors in the presence of VPR-ZFP266 (**C**) in HEK293 cells. RLU: Relative Light Units, \* $p < 0.05$ ,  
 84 \*\*\*\* $p < 0.0001$  based on a two-way ANOVA test. **D.** *B3gnt3*, *Pwll2* and *Snx20* mRNA expression from the *Zfp266*  
 85 Wt and KO reprogramming RNA-seq data. **E.** ATAC-seq, ChIP-seq signals at the *B3gnt3*, *Pwll2* and *Snx20* MORs,  
 86 cloned in both forward (F) and reverse (R) directions (relative to gene orientation) for luciferase reporter assays  
 87 (highlighted in orange). **F-J.** Luciferase reporter assay with an empty reporter vector pGL3 or vectors containing  
 88 *B3gnt3*, *Pwll2* and *Snx20* MORs co-transfected with either BFP, VPR only or VPR-Zfp266 expression vectors (**F**),  
 89 co-transfected with either BFP or Wt Zfp266 expression vectors in the presence of VPR-ZFP266 (**G**), an empty

90 reporter vector pGL3, vectors containing *B3gnt3* (**H**), *Piwil2* (**I**) and *Snx20* (**J**) MORs with ( $\Delta$ B1) or without (Wt) B1  
91 SINE deletion co-transfected with either BFP, VPR only or VPR-*Zfp266* expression vectors in HEK293 cells. **K**, **L**.  
92 Luciferase reporter assay with empty reporter vector pGL3 or vectors containing *B3gnt3*, *Piwil2* and *Snx20* MORs  
93 (**K**), *Snx20* MOR reporter with ( $\Delta$ B1) or without (Wt) B1 SINE deletion (**L**), using MEF with or without OSKM  
94 expression. \* $p < 0.05$ , \*\* $p < 0.01$ , \*\*\* $p < 0.001$ , \*\*\*\* $p < 0.0001$  based on a two-way ANOVA test. **M**. Day 9 and day  
95 14 after OSKM induction with overexpression of either BFP, VPR only or VPR-*Zfp266*. Red; mOrange, Green;  
96 *Nanog*-GFP. **N**. Quantification of *Nanog*-GFP<sup>+</sup> colony numbers at day 9 and day 14. \*\*\*\* $p < 0.0001$  based on a  
97 one-way ANOVA test. **O**. Mechanistic model of how *Zfp266* KO enhances reprogramming. ZFP266 recruited by  
98 OSK to their target loci binds to adjacent B1 SINE and impedes chromatin opening (top). *Zfp266* KO results in  
99 increased chromatin accessibility in those loci, facilitating pluripotency gene expression.
